# Supplementary material for: Improving estimates of the burden of severe wasting: analysis of secondary prevalence and incidence data from 352 sites
Source: PubMed Central journal article supplement (PMC7929878; doi:10.1136/bmjgh-2020-004342), 2021-03-02
Supplement: bmjgh-2020-004342supp001.pdf [file bmjgh-2020-004342supp001.pdf]

## Supplementary Online Material

**Supplementary Table 1. Program data received from 34 countries for analysis of incidence correction factors**

| Country                          | N Prev | N Prev with raw data | N matched Prev, Pop, and Adm | N Cov | N Prev, Pop, Adm, and exact Cov match | Data analyzable |
|----------------------------------|--------|----------------------|------------------------------|-------|---------------------------------------|-----------------|
| <b>All</b>                       | 3461   | 2905                 | 385                          | 264   | 63                                    | ---             |
| <b>Western and Central</b>       |        |                      |                              |       |                                       |                 |
| <b>Africa</b>                    | 1442   | 1173                 | 199                          | 165   | 46                                    | ---             |
| Burkina Faso                     | 199    | 169                  | 31                           | 24    | 5                                     | Yes             |
| Chad                             | 275    | 214                  | 26                           | 28    | 8                                     | Yes             |
| Democratic Republic of the Congo | 217    | 216                  | 3                            | 12    | 1                                     | Yes             |
| Gambia                           | 2      | 2                    | 2                            | 0     | 0                                     | No              |
| Ghana                            | 33     | 23                   | 3                            | 6     | 3                                     | Yes             |
| Guinea                           | 24     | 24                   | 0                            | 0     | 0                                     | No              |
| Ivory Coast                      | 52     | 49                   | 0                            | 3     | 0                                     | No              |
| Liberia                          | 36     | 36                   | 15                           | 1     | 0                                     | Yes             |
| Mali                             | 87     | 65                   | 32                           | 31    | 10                                    | Yes             |
| Mauritania                       | 130    | 89                   | 2                            | 4     | 1                                     | Yes             |
| Niger                            | 140    | 83                   | 16                           | 27    | 3                                     | Yes             |
| Nigeria                          | 188    | 144                  | 69                           | 28    | 15                                    | Yes             |
| Sierra Leone                     | 59     | 59                   | 0                            | 1     | 0                                     | No              |
| <b>Eastern and Southern</b>      |        |                      |                              |       |                                       |                 |
| <b>Africa</b>                    | 1535   | 1309                 | 130                          | 65    | 10                                    | ---             |
| Angola                           | 1      | 1                    | 1                            | 2     | 1                                     | Yes             |
| Burundi                          | 25     | 25                   | 1                            | 1     | 0                                     | Yes             |
| Djibouti                         | 14     | 14                   | 6                            | 0     | 0                                     | No              |
| Ethiopia                         | 295    | 270                  | 29                           | 17    | 2                                     | Yes             |
| Kenya                            | 344    | 168                  | 27                           | 26    | 6                                     | Yes             |
| Madagascar                       | 12     | 12                   | 8                            | 1     | 1                                     | Yes             |
| Malawi                           | 35     | 35                   | 19                           | 0     | 0                                     | No              |
| Mozambique                       | 38     | 37                   | 6                            | 0     | 0                                     | No              |
| Somalia                          | 521    | 521                  | 2                            | 12    | 0                                     | Yes             |
| South Sudan                      | 166    | 144                  | 5                            | 3     | 0                                     | Yes             |
| Uganda                           | 70     | 69                   | 26                           | 2     | 0                                     | Yes             |
| Zambia                           | 14     | 14                   | 0                            | 1     | 0                                     | No              |

|                                     |     |     |    |    |   |     |
|-------------------------------------|-----|-----|----|----|---|-----|
| <b>South Asia</b>                   | 156 | 131 | 16 | 16 | 2 | --- |
| Afghanistan                         | 71  | 65  | 16 | 9  | 2 | Yes |
| Bangladesh                          | 43  | 42  | 0  | 2  | 0 | No  |
| Nepal                               | 25  | 12  | 0  | 2  | 0 | No  |
| Pakistan                            | 17  | 12  | 0  | 3  | 0 | No  |
| <b>Middle East and North Africa</b> | 208 | 176 | 35 | 9  | 1 | --- |
| Sudan                               | 137 | 135 | 0  | 8  | 0 | No  |
| Syria                               | 1   | 0   | 0  | 0  | 0 | No  |
| Yemen                               | 70  | 41  | 35 | 1  | 1 | Yes |
| <b>East Asia and Pacific</b>        | 45  | 42  | 5  | 7  | 4 | --- |
| Myanmar                             | 45  | 42  | 5  | 7  | 4 | Yes |
| <b>Americas</b>                     | 75  | 74  | 0  | 2  | 0 | --- |
| Haiti                               | 75  | 74  | 0  | 2  | 0 | No  |

Abbreviations: Prev, prevalence survey; Pop, population estimate; Adm, program admissions data; Cov, coverage survey

Supplemental Table 2. Coverage survey estimates

| Country      | Directly matched with prevalence data | Coverage survey type | Coverage Date | Coverage Location                                           | Coverage Point Estimate | LCL   | UCL   |
|--------------|---------------------------------------|----------------------|---------------|-------------------------------------------------------------|-------------------------|-------|-------|
| Afghanistan  | Yes                                   | SQUEAC               | 3/1/2015      | Paktya province; Chamkani, Ahmad abad, and Gardez districts | 0.533                   | 0.425 | 0.644 |
| Afghanistan  | Yes                                   | SQUEAC               | 4/1/2015      | Nangarhar Province; Jalalabad, Kama, and Behsud districts   | 0.526                   | 0.416 | 0.634 |
| Afghanistan  | No                                    | SQUEAC               | 5/1/2015      | Laskargah, Nad-Ali, and Nawa districts of Helmand Province  | 0.239                   | 0.141 | 0.336 |
| Afghanistan  | No                                    | SQUEAC               | 5/1/2015      | Khandahar City, Khandahar Province                          | 0.407                   | 0.323 | 0.491 |
| Angola       | Yes                                   | SLEAC                | 4/20/2017     | Huila and Cunene Provinces                                  | 0.262                   | 0.139 | 0.420 |
| Burkina Faso | No                                    | SQUEAC               | 2/1/2010      | DS Diapaga, Est Region                                      | 0.206                   | 0.110 | 0.301 |
| Burkina Faso | Yes                                   | SQUEAC               | 3/1/2011      | DS Diapaga, Est Region                                      | 0.176                   | 0.078 | 0.316 |
| Burkina Faso | Yes                                   | SQUEAC               | 11/1/2011     | DS Seguenega, Nord Region                                   | 0.468                   | 0.318 | 0.617 |
| Burkina Faso | Yes                                   | SQUEAC               | 2/1/2012      | DS Fada, Est Region                                         | 0.191                   | 0.081 | 0.302 |
| Burkina Faso | Yes                                   | SQUEAC               | 3/1/2012      | DS Diapaga, Est Region                                      | 0.321                   | 0.207 | 0.436 |
| Burkina Faso | Yes                                   | SQUEAC               | 6/1/2012      | DS Dori, Sahel Region                                       | 0.385                   | 0.284 | 0.485 |
| Burkina Faso | Yes                                   | SQUEAC               | 11/1/2012     | DS Pama, Est Region                                         | 0.346                   | 0.217 | 0.475 |
| Burkina Faso | Yes                                   | SQUEAC               | 12/15/2012    | DS Djibo, Sahel Region                                      | 0.473                   | 0.357 | 0.589 |
| Burkina Faso | Yes                                   | SQUEAC               | 2/15/2013     | DS Yako, Nord Region                                        | 0.308                   | 0.202 | 0.413 |
| Burkina Faso | Yes                                   | SQUEAC               | 5/15/2013     | DS Bogande, Est Region                                      | 0.302                   | 0.197 | 0.406 |
| Burkina Faso | Yes                                   | SQUEAC               | 5/15/2013     | DS Manni, Est Region                                        | 0.261                   | 0.156 | 0.366 |
| Burkina Faso | Yes                                   | SQUEAC               | 11/15/2013    | DS Gorom-Gorom, Sahel Region                                | 0.375                   | 0.282 | 0.468 |
| Burkina Faso | Yes                                   | SQUEAC               | 11/15/2013    | DS Sebba, Sahel Region                                      | 0.461                   | 0.354 | 0.567 |
| Burkina Faso | Yes                                   | SQUEAC               | 1/15/2014     | DS Fada N'Gourma, Est Region                                | 0.494                   | 0.385 | 0.602 |
| Burkina Faso | Yes                                   | SQUEAC               | 2/1/2014      | DS Ouargaye, Centre Est Region                              | 0.218                   | 0.132 | 0.305 |
| Burkina Faso | Yes                                   | SQUEAC               | 2/1/2014      | DS Zorgho, Plateau Central Region                           | 0.533                   | 0.410 | 0.657 |
| Burkina Faso | Yes                                   | SQUEAC               | 2/15/2014     | DS Manni, Est Region                                        | 0.524                   | 0.429 | 0.619 |
| Burkina Faso | Yes                                   | SQUEAC               | 2/15/2014     | DS Koudougou, Centre Ouest Region                           | 0.615                   | 0.512 | 0.717 |

| <b>Country</b> | <b>Directly matched with prevalence data</b> | <b>Coverage survey type</b> | <b>Coverage Date</b> | <b>Coverage Location</b>                                 | <b>Coverage Point Estimate</b> | <b>LCL</b> | <b>UCL</b> |
|----------------|----------------------------------------------|-----------------------------|----------------------|----------------------------------------------------------|--------------------------------|------------|------------|
| Burkina Faso   | Yes                                          | SQUEAC                      | 2/15/2014            | DS Bogande, Est Region                                   | 0.364                          | 0.272      | 0.456      |
| Burkina Faso   | Yes                                          | SQUEAC                      | 2/15/2014            | DS Diapaga, Est Region                                   | 0.436                          | 0.340      | 0.531      |
| Burkina Faso   | Yes                                          | SQUEAC                      | 2/15/2014            | DS Reo, Centre Ouest Region                              | 0.389                          | 0.281      | 0.497      |
| Burkina Faso   | Yes                                          | SQUEAC                      | 2/15/2014            | DS Nanoro, Centre Ouest Region                           | 0.350                          | 0.222      | 0.478      |
| Burkina Faso   | Yes                                          | SQUEAC                      | 9/26/2015            | DS Gourcy, Nord Region                                   | 0.488                          | 0.381      | 0.595      |
| Burkina Faso   | Yes                                          | SQUEAC                      | 3/1/2017             | DS Fada N'gourma, Est Region                             | 0.435                          | 0.339      | 0.531      |
| Burundi        | No                                           | CSAS                        | 2/1/2013             | Muramvya Province                                        | 0.425                          | 0.354      | 0.494      |
| Chad           | No                                           | SQUEAC                      | 12/1/2010            | Région de Kanem; District sanitaire de Mao               | 0.271                          | 0.165      | 0.394      |
| Chad           | No                                           | SQUEAC                      | 9/1/2011             | Région de Kanem; Districts Sanitaires de Mao et de Mondo | 0.364                          | 0.269      | 0.471      |
| Chad           | No                                           | SQUEAC                      | 11/1/2011            | Région de Bahr el Ghazel; District Sanitaire de Moussoro | 0.341                          | 0.221      | 0.486      |
| Chad           | No                                           | SQUEAC                      | 8/1/2012             | Région de Kanem; Districts Sanitaires de Mao et de Mondo | 0.376                          | 0.276      | 0.485      |
| Chad           | No                                           | SQUEAC                      | 9/1/2012             | Région du Bahr el Gazal Sud, Moussoro                    | 0.291                          | 0.206      | 0.394      |
| Chad           | No                                           | SQUEAC                      | 10/1/2012            | Région de Bahr el Ghazel, DS de Moussoro                 | 0.341                          | 0.221      | 0.486      |
| Chad           | Yes                                          | SQUEAC                      | 1/1/2013             | Région de Kanem; Districts de Mao et Mondo               | 0.374                          | 0.282      | 0.478      |
| Chad           | Yes                                          | SQUEAC                      | 3/1/2013             | Région de Wadi Fira, DS d'Iriba                          | 0.364                          | 0.269      | 0.460      |
| Chad           | Yes                                          | SQUEAC                      | 3/1/2013             | Région de Sila, DS d'Amdam                               | 0.443                          | 0.339      | 0.547      |
| Chad           | Yes                                          | SQUEAC                      | 4/1/2013             | Région de Bahr el Ghazel - Sud                           | 0.415                          | 0.279      | 0.552      |
| Chad           | Yes                                          | SQUEAC                      | 4/1/2013             | Région de Batha, DS d'Ati et d'Oum Hadjer                | 0.197                          | 0.109      | 0.285      |
| Chad           | No                                           | SQUEAC                      | 9/1/2013             | Région de Bahr el Gazal, Sud                             | 0.377                          | 0.290      | 0.473      |
| Chad           | Yes                                          | SQUEAC                      | 9/1/2013             | Région de Kanem, districts de Mao et de Mondo            | 0.353                          | 0.255      | 0.467      |
| Chad           | Yes                                          | SQUEAC                      | 10/1/2013            | Région de Sila, DS de Goz Beida                          | 0.376                          | 0.260      | 0.491      |
| Chad           | Yes                                          | SQUEAC                      | 11/1/2013            | Région de Salamat, DS d'Aboudeia                         | 0.431                          | 0.326      | 0.536      |
| Chad           | Yes                                          | SQUEAC                      | 12/1/2013            | Région de Hadjer Lamis, DS de Massaguet                  | 0.460                          | 0.357      | 0.563      |
| Chad           | Yes                                          | SQUEAC                      | 1/1/2014             | Région de Hadjer Lamis, DS de Bokoro                     | 0.346                          | 0.248      | 0.443      |
| Chad           | Yes                                          | SQUEAC                      | 8/1/2014             | Région de Guera, DS de Bitkine                           | 0.276                          | 0.167      | 0.385      |

| Country  | Directly matched with prevalence data | Coverage survey type | Coverage Date | Coverage Location                                                                                   | Coverage Point Estimate | LCL   | UCL   |
|----------|---------------------------------------|----------------------|---------------|-----------------------------------------------------------------------------------------------------|-------------------------|-------|-------|
| Chad     | Yes                                   | SQUEAC               | 9/1/2014      | Région de Guera, DS de Mangalmé                                                                     | 0.449                   | 0.365 | 0.533 |
| Chad     | No                                    | SQUEAC               | 3/1/2015      | Région de Bahr el Gazal, DS de Chaddra et Moussoro                                                  | 0.617                   | 0.509 | 0.724 |
| DRC      | No                                    | SLEAC                | 7/1/2012      | Territoires de Bagata, Popokabaka, KasongoLunda (BandunduLubutu (Maniema) et Lodja (Kasaï-Oriental) | 0.100                   | 0.072 | 0.133 |
| DRC      | No                                    | SQUEAC               | 1/15/2013     | Kisantu                                                                                             | 0.265                   | 0.166 | 0.365 |
| DRC      | No                                    | SQUEAC               | 2/15/2013     | Opala                                                                                               | 0.315                   | 0.196 | 0.433 |
| DRC      | No                                    | SQUEAC               | 2/15/2013     | Bafwasende                                                                                          | 0.405                   | 0.260 | 0.549 |
| DRC      | No                                    | SQUEAC               | 6/1/2013      | Manono                                                                                              | 0.499                   | 0.380 | 0.618 |
| DRC      | No                                    | SQUEAC               | 10/1/2013     | Opienge                                                                                             | 0.416                   | 0.291 | 0.541 |
| DRC      | No                                    | SQUEAC               | 3/15/2014     | Mosango                                                                                             | 0.327                   | 0.219 | 0.435 |
| DRC      | No                                    | SQUEAC               | 12/1/2014     | Kirotshe                                                                                            | 0.323                   | 0.231 | 0.416 |
| DRC      | No                                    | SQUEAC               | 2/1/2015      | Kirotshe                                                                                            | 0.392                   | 0.292 | 0.492 |
| DRC      | Yes                                   | SQUEAC               | 3/31/2016     | Kalomba                                                                                             | 0.379                   | 0.282 | 0.475 |
| Ethiopia | No                                    | SQUEAC               | 1/1/2010      | Arsi Negele                                                                                         | 0.200                   | 0.090 | 0.310 |
| Ethiopia | No                                    | SQUEAC               | 9/1/2012      | Dollo Ado Camp                                                                                      | 0.613                   | 0.473 | 0.753 |
| Ethiopia | No                                    | SQUEAC               | 7/1/2013      | Meyu Muluke                                                                                         | 0.652                   | 0.543 | 0.762 |
| Ethiopia | No                                    | SQUEAC               | 8/1/2013      | Dollo Ado Camp                                                                                      | 0.887                   | 0.815 | 0.960 |
| Ethiopia | No                                    | SQUEAC               | 9/15/2014     | Bati                                                                                                | 0.416                   | 0.272 | 0.560 |
| Ethiopia | No                                    | SQUEAC               | 11/1/2014     | Adadle Woreda, Somali                                                                               | 0.538                   | 0.441 | 0.635 |
| Ethiopia | Yes                                   | SQUEAC               | 2/2/2015      | Sekota                                                                                              | 0.422                   | 0.300 | 0.543 |
| Ethiopia | No                                    | SQUEAC               | 6/26/2015     | Boloso Sore                                                                                         | 0.431                   | 0.332 | 0.529 |
| Ethiopia | No                                    | SQUEAC               | 9/1/2016      | Hintalo Wajirat                                                                                     | 0.457                   | 0.324 | 0.599 |
| Ethiopia | No                                    | SQUEAC               | 1/1/2017      | Sahreti Samre Woreda, Tigray                                                                        | 0.528                   | 0.433 | 0.648 |
| Ethiopia | No                                    | SQUEAC               | 2/1/2017      | Abaya Woreda, Oromia                                                                                | 0.377                   | 0.275 | 0.487 |
| Ethiopia | No                                    | SQUEAC               | 2/1/2017      | Abergele Woreda, Amhara                                                                             | 0.355                   | 0.259 | 0.450 |

| Country  | Directly matched with prevalence data | Coverage survey type | Coverage Date | Coverage Location                           | Coverage Point |       |       |
|----------|---------------------------------------|----------------------|---------------|---------------------------------------------|----------------|-------|-------|
|          |                                       |                      |               |                                             | Estimate       | LCL   | UCL   |
| Ethiopia | No                                    | SQUEAC               | 4/1/2017      | Shashamane Woreda, Oromia                   | 0.492          | 0.392 | 0.593 |
| Ethiopia | Yes                                   | SQUEAC               | 4/1/2017      | Miesso Woreda, Oromiya                      | 0.509          | 0.378 | 0.637 |
| Ethiopia | No                                    | SQUEAC               | 5/1/2017      | Deder Woreda, Oromia                        | 0.521          | 0.383 | 0.660 |
| Ethiopia | No                                    | SQUEAC               | 6/1/2017      | Bena Woreda                                 | 0.358          | 0.234 | 0.482 |
| Ethiopia | No                                    | SQUEAC               | 6/1/2017      | Aleto Chuko Woreda, SNNPR                   | 0.543          | 0.418 | 0.668 |
| Ghana    | Yes                                   | SLEAC                | 3/1/2014      | Tamale Metro district, Northern Region      | 0.026          | 0.001 | 0.138 |
| Ghana    | Yes                                   | SLEAC                | 3/1/2014      | Kassena Nankana district, Upper East Region | 0.067          | 0.002 | 0.319 |
| Ghana    | Yes                                   | SLEAC                | 3/1/2014      | Wa East district, Upper West Region         | 0.071          | 0.002 | 0.339 |
| Ghana    | Yes                                   | SLEAC                | 3/1/2014      | Tolon district, Northern Region             | 0.083          | 0.002 | 0.385 |
| Ghana    | Yes                                   | SLEAC                | 3/1/2014      | Bawku West district, Upper East Region      | 0.450          | 0.231 | 0.685 |
| Ghana    | Yes                                   | SLEAC                | 3/1/2014      | Jirapa district, Upper West Region          | 0.083          | 0.002 | 0.385 |
| Kenya    | Yes                                   | SQUEAC               | 6/1/2012      | West Pokot                                  | 0.335          | 0.230 | 0.440 |
| Kenya    | Yes                                   | SQUEAC               | 10/26/2012    | Merti                                       | 0.335          | 0.183 | 0.487 |
| Kenya    | Yes                                   | SQUEAC               | 12/15/2012    | Laikipia                                    | 0.419          | 0.309 | 0.529 |
| Kenya    | No                                    | SQUEAC               | 2/15/2013     | Kisumu East                                 | 0.490          | 0.392 | 0.588 |
| Kenya    | Yes                                   | SQUEAC               | 3/15/2013     | Garbatulla                                  | 0.505          | 0.337 | 0.673 |
| Kenya    | No                                    | SQUEAC               | 6/15/2013     | Njiru                                       | 0.521          | 0.413 | 0.629 |
| Kenya    | No                                    | SQUEAC               | 6/15/2013     | Westlands                                   | 0.499          | 0.385 | 0.613 |
| Kenya    | No                                    | SQUEAC               | 6/15/2013     | Makadara                                    | 0.340          | 0.231 | 0.449 |
| Kenya    | No                                    | SQUEAC               | 6/15/2013     | Starehe                                     | 0.519          | 0.403 | 0.635 |
| Kenya    | No                                    | SQUEAC               | 6/15/2013     | Kamukunji                                   | 0.666          | 0.555 | 0.777 |
| Kenya    | No                                    | SQUEAC               | 6/15/2013     | Embakasi                                    | 0.310          | 0.199 | 0.421 |
| Kenya    | No                                    | SQUEAC               | 6/15/2013     | Kasarani                                    | 0.391          | 0.274 | 0.508 |
| Kenya    | No                                    | SQUEAC               | 6/15/2013     | Dagoretti                                   | 0.508          | 0.372 | 0.644 |
| Kenya    | Yes                                   | SLEAC                | 7/1/2013      | West Pokot                                  | 0.217          | 0.127 | 0.307 |

| Country    | Directly matched with prevalence data | Coverage survey type | Coverage Date | Coverage Location                              | Coverage Point Estimate | LCL   | UCL   |
|------------|---------------------------------------|----------------------|---------------|------------------------------------------------|-------------------------|-------|-------|
| Kenya      | No                                    | SQUEAC               | 9/15/2013     | Wajir East                                     | 0.546                   | 0.408 | 0.684 |
| Kenya      | No                                    | SQUEAC               | 10/6/2013     | Mandera West                                   | 0.462                   | 0.329 | 0.596 |
| Kenya      | No                                    | SQUEAC               | 10/15/2013    | Mandera Central                                | 0.504                   | 0.374 | 0.634 |
| Kenya      | No                                    | SQUEAC               | 10/15/2013    | Chalbi                                         | 0.202                   | 0.078 | 0.326 |
| Kenya      | No                                    | SQUEAC               | 10/15/2013    | Wajir South                                    | 0.426                   | 0.284 | 0.568 |
| Kenya      | No                                    | SQUEAC               | 6/1/2014      | West Pokot                                     | 0.325                   | 0.135 | 0.515 |
| Kenya      | No                                    | SQUEAC               | 3/18/2015     | Dadaab Hagadera                                | 0.901                   | 0.835 | 0.966 |
| Kenya      | No                                    | SQUEAC               | 5/28/2015     | Dadaab IFO N                                   | 0.801                   | 0.716 | 0.887 |
| Kenya      | No                                    | SQUEAC               | 6/17/2015     | Dadaab Kambioos                                | 0.868                   | 0.792 | 0.945 |
| Kenya      | No                                    | SQUEAC               | 10/28/2015    | East Pokot                                     | 0.457                   | 0.310 | 0.605 |
| Kenya      | Yes                                   | SQUEAC               | 9/1/2016      | Laisamis Sub-county, Marsabit County           | 0.546                   | 0.419 | 0.673 |
| Kenya      | Yes                                   | SQUEAC               | 9/1/2016      | Saku Sub-county, Marsabit County               | 0.530                   | 0.384 | 0.676 |
| Liberia    | No                                    | SQUEAC               | 2/1/2011      | Monrovia                                       | 0.248                   | 0.156 | 0.370 |
| Madagascar | Yes                                   | SLEAC                | 11/1/2017     | District de Betioky; Région d'Atsimo Andrefana | 0.287                   | 0.209 | 0.376 |
| Mali       | No                                    | SQUEAC               | 8/1/2011      | Région de Gao                                  | 0.354                   | 0.273 | 0.447 |
| Mali       | No                                    | SQUEAC               | 8/1/2011      | Gao                                            | 0.354                   | 0.265 | 0.444 |
| Mali       | No                                    | SQUEAC               | 3/1/2013      | Cercle de Kita                                 | 0.249                   | 0.146 | 0.393 |
| Mali       | No                                    | SQUEAC               | 3/15/2013     | Kita                                           | 0.249                   | 0.123 | 0.375 |
| Mali       | No                                    | SQUEAC               | 4/2/2013      | Kati Cercle, Koulikoro Region                  | 0.697                   | 0.627 | 0.767 |
| Mali       | Yes                                   | SQUEAC               | 12/15/2013    | Koutiala Cercle, Sikassa Region                | 0.327                   | 0.222 | 0.432 |
| Mali       | Yes                                   | SLEAC                | 4/1/2014      | Région de Kayes                                | 0.245                   | 0.181 | 0.306 |
| Mali       | Yes                                   | SLEAC                | 4/1/2014      | Région de Koulikoro                            | 0.319                   | 0.269 | 0.371 |
| Mali       | Yes                                   | SLEAC                | 4/1/2014      | Région de Mopti                                | 0.128                   | 0.071 | 0.188 |
| Mali       | Yes                                   | SLEAC                | 4/1/2014      | Région de Sikasso                              | 0.235                   | 0.183 | 0.288 |
| Mali       | Yes                                   | SLEAC                | 4/1/2014      | Région de Tombouctou                           | 0.188                   | 0.131 | 0.228 |

| Country    | Directly matched with prevalence data | Coverage survey type | Coverage Date | Coverage Location             | Coverage Point Estimate | LCL   | UCL   |
|------------|---------------------------------------|----------------------|---------------|-------------------------------|-------------------------|-------|-------|
| Mali       | Yes                                   | SQUEAC               | 4/15/2014     | Nara Cercle, Koulikoro Region | 0.268                   | 0.185 | 0.350 |
| Mali       | Yes                                   | SQUEAC               | 7/29/2014     | Tominian Cercle, Segou Region | 0.197                   | 0.098 | 0.296 |
| Mali       | Yes                                   | SQUEAC               | 8/1/2014      | Kenieba Cercle, Kayes Region  | 0.259                   | 0.158 | 0.360 |
| Mali       | Yes                                   | SQUEAC               | 9/12/2014     | Macina Cercle, Segou Region   | 0.364                   | 0.235 | 0.494 |
| Mali       | Yes                                   | SQUEAC               | 10/13/2014    | Mopti Cercle, Mopti Region    | 0.463                   | 0.360 | 0.566 |
| Mali       | No                                    | SQUEAC               | 11/1/2014     | Markala                       | 0.273                   | 0.191 | 0.355 |
| Mali       | Yes                                   | SQUEAC               | 12/1/2014     | Kita Cercle, Kayes Region     | 0.364                   | 0.256 | 0.489 |
| Mali       | Yes                                   | SQUEAC               | 12/1/2014     | Kita Cercle, Kayes Region     | 0.527                   | 0.405 | 0.649 |
| Mali       | Yes                                   | SQUEAC               | 12/4/2014     | Segou Cercle, Segou Region    | 0.696                   | 0.614 | 0.779 |
| Mali       | Yes                                   | SQUEAC               | 1/1/2015      | Kati Cercle, Koulikoro Region | 0.402                   | 0.297 | 0.508 |
| Mali       | Yes                                   | SQUEAC               | 2/6/2015      | Nioro Cercle, Kayes Region    | 0.442                   | 0.315 | 0.569 |
| Mali       | Yes                                   | SQUEAC               | 3/1/2015      | Yelimane Cercle, Kayes Region | 0.309                   | 0.205 | 0.414 |
| Mali       | Yes                                   | SQUEAC               | 3/1/2015      | Kayes Cercle, Kayes Region    | 0.211                   | 0.113 | 0.310 |
| Mali       | Yes                                   | SQUEAC               | 7/1/2015      | Kita Cercle, Kayes Region     | 0.316                   | 0.226 | 0.422 |
| Mali       | Yes                                   | SQUEAC               | 11/15/2015    | Baroueli Cercle, Segou Region | 0.348                   | 0.248 | 0.448 |
| Mali       | Yes                                   | SQUEAC               | 11/30/2015    | Kati Cercle, Koulikoro Region | 0.486                   | 0.380 | 0.592 |
| Mali       | Yes                                   | SQUEAC               | 12/20/2015    | Macina Cercle, Segou Region   | 0.382                   | 0.270 | 0.493 |
| Mali       | No                                    | SQUEAC               | 12/22/2015    | Markala                       | 0.425                   | 0.313 | 0.538 |
| Mali       | Yes                                   | SQUEAC               | 1/1/2017      | Koro Cercle, Mopti Region     | 0.385                   | 0.285 | 0.484 |
| Mauritania | No                                    | CSAS                 | 12/1/2009     | Guidimakha Region             | 0.293                   | 0.161 | 0.455 |
| Mauritania | No                                    | SQUEAC               | 3/1/2011      | Guidimakha Region             | 0.330                   | 0.207 | 0.487 |
| Mauritania | No                                    | SQUEAC               | 5/1/2012      | Guidimakha Region             | 0.382                   | 0.263 | 0.516 |
| Mauritania | Yes                                   | SLEAC                | 11/1/2013     | Gorgol Region                 | 0.321                   | 0.199 | 0.463 |
| Myanmar    | No                                    | SQUEAC               | 11/30/2011    | Maungdaw and Buthidaung       | 0.407                   | 0.335 | 0.479 |
| Myanmar    | No                                    | SQUEAC               | 11/30/2011    | Buthidaung                    | 0.613                   | 0.510 | 0.716 |



| <b>Country</b> | <b>Directly matched with prevalence data</b> | <b>Coverage survey type</b> | <b>Coverage Date</b> | <b>Coverage Location</b> | <b>Coverage Point Estimate</b> | <b>LCL</b> | <b>UCL</b> |
|----------------|----------------------------------------------|-----------------------------|----------------------|--------------------------|--------------------------------|------------|------------|
| Myanmar        | No                                           | SQUEAC                      | 1/1/2014             | Pauktaw IDP              | 0.921                          | 0.835      | 1.000      |
| Myanmar        | Yes                                          | SQUEAC                      | 10/1/2014            | Sittwe Rural             | 0.653                          | 0.538      | 0.767      |
| Myanmar        | Yes                                          | SQUEAC                      | 12/1/2014            | Buthidung Township       | 0.567                          | 0.483      | 0.647      |
| Myanmar        | Yes                                          | SQUEAC                      | 12/1/2014            | Maungdaw                 | 0.297                          | 0.214      | 0.379      |
| Myanmar        | Yes                                          | SQUEAC                      | 2/1/2015             | Pauktaw IDP              | 0.821                          | 0.716      | 0.927      |
| Niger          | No                                           | SQUEAC                      | 1/1/2012             | Matameye                 | 0.532                          | 0.451      | 0.614      |
| Niger          | No                                           | SQUEAC                      | 5/1/2012             | Keita                    | 0.214                          | 0.142      | 0.286      |
| Niger          | No                                           | SQUEAC                      | 2/1/2013             | Mayahi                   | 0.312                          | 0.248      | 0.377      |
| Niger          | No                                           | SQUEAC                      | 2/1/2013             | Tessaoua                 | 0.293                          | 0.204      | 0.383      |
| Niger          | No                                           | SQUEAC                      | 2/1/2013             | Keita                    | 0.281                          | 0.198      | 0.364      |
| Niger          | No                                           | SQUEAC                      | 2/2/2013             | N'Guigmi                 | 0.629                          | 0.466      | 0.792      |
| Niger          | No                                           | SQUEAC                      | 3/15/2013            | Gaya                     | 0.296                          | 0.201      | 0.391      |
| Niger          | No                                           | SQUEAC                      | 6/15/2013            | Zinder                   | 0.480                          | 0.377      | 0.584      |
| Niger          | No                                           | SQUEAC                      | 6/19/2013            | Tera                     | 0.527                          | 0.417      | 0.638      |
| Niger          | No                                           | SQUEAC                      | 8/1/2013             | Fillingué                | 0.245                          | 0.121      | 0.370      |
| Niger          | No                                           | SQUEAC                      | 9/1/2013             | Ouallam                  | 0.240                          | 0.166      | 0.314      |
| Niger          | No                                           | SQUEAC                      | 9/15/2013            | Mirriah                  | 0.342                          | 0.265      | 0.418      |
| Niger          | No                                           | SQUEAC                      | 11/1/2013            | Matameye                 | 0.369                          | 0.301      | 0.436      |
| Niger          | No                                           | SQUEAC                      | 12/1/2013            | Fillingué                | 0.318                          | 0.233      | 0.403      |
| Niger          | No                                           | SQUEAC                      | 12/1/2013            | Agadez                   | 0.479                          | 0.386      | 0.572      |
| Niger          | No                                           | SQUEAC                      | 12/18/2013           | Dakoro                   | 0.639                          | 0.568      | 0.710      |
| Niger          | No                                           | SQUEAC                      | 12/31/2013           | Maine-Soroa              | 0.505                          | 0.384      | 0.626      |
| Niger          | No                                           | SQUEAC                      | 1/1/2014             | Illéla                   | 0.361                          | 0.272      | 0.451      |
| Niger          | No                                           | SQUEAC                      | 3/1/2014             | Madarounfa               | 0.197                          | 0.137      | 0.256      |
| Niger          | No                                           | SQUEAC                      | 7/1/2014             | Tanout                   | 0.476                          | 0.369      | 0.582      |

| Country | Directly matched with prevalence data | Coverage survey type | Coverage Date | Coverage Location      | Coverage Point Estimate | LCL   | UCL   |
|---------|---------------------------------------|----------------------|---------------|------------------------|-------------------------|-------|-------|
| Niger   | Yes                                   | SQUEAC               | 8/1/2014      | Mirriah, Zinder        | 0.317                   | 0.206 | 0.372 |
| Niger   | Yes                                   | SQUEAC               | 11/3/2014     | Tillaberi              | 0.528                   | 0.426 | 0.629 |
| Niger   | Yes                                   | SQUEAC               | 12/16/2014    | Agadez                 | 0.439                   | 0.352 | 0.526 |
| Niger   | Yes                                   | SQUEAC               | 11/26/2015    | Tanout                 | 0.376                   | 0.299 | 0.452 |
| Niger   | Yes                                   | SQUEAC               | 12/31/2015    | Tillaberi              | 0.598                   | 0.489 | 0.708 |
| Nigeria | Yes                                   | SQUEAC               | 7/29/2011     | Fune, Yobe             | 0.330                   | 0.238 | 0.422 |
| Nigeria | Yes                                   | SQUEAC               | 4/15/2013     | Fune, Yobe             | 0.348                   | 0.237 | 0.458 |
| Nigeria | Yes                                   | SQUEAC               | 5/15/2013     | Baure, Katsina         | 0.534                   | 0.439 | 0.629 |
| Nigeria | Yes                                   | SQUEAC               | 11/21/2013    | Birnin Kudu, Jigawa    | 0.223                   | 0.148 | 0.298 |
| Nigeria | Yes                                   | SQUEAC               | 11/21/2013    | Gwiwa, Jigawa          | 0.480                   | 0.374 | 0.586 |
| Nigeria | Yes                                   | SQUEAC               | 11/21/2013    | Guri, Jigawa           | 0.504                   | 0.399 | 0.610 |
| Nigeria | Yes                                   | SQUEAC               | 2/1/2014      | Bakura, Zamfara        | 0.471                   | 0.379 | 0.562 |
| Nigeria | Yes                                   | SQUEAC               | 2/1/2014      | Bungudu, Zamfara       | 0.349                   | 0.257 | 0.442 |
| Nigeria | Yes                                   | SQUEAC               | 2/1/2014      | Shinkafi, Zamfara      | 0.470                   | 0.363 | 0.578 |
| Nigeria | Yes                                   | SQUEAC               | 3/15/2014     | Goronyo, Sokoto        | 0.143                   | 0.079 | 0.208 |
| Nigeria | Yes                                   | SQUEAC               | 4/15/2014     | Kalgo, Kebbi           | 0.305                   | 0.206 | 0.403 |
| Nigeria | Yes                                   | SQUEAC               | 5/1/2014      | Damaturu, Yobe         | 0.282                   | 0.192 | 0.373 |
| Nigeria | Yes                                   | SQUEAC               | 6/1/2014      | Birnin Magaji, Zamfara | 0.292                   | 0.227 | 0.357 |
| Nigeria | Yes                                   | SQUEAC               | 7/1/2014      | Kiyawa, Jigawa         | 0.485                   | 0.411 | 0.558 |
| Nigeria | Yes                                   | SQUEAC               | 7/1/2014      | Kaita, Katsina         | 0.324                   | 0.221 | 0.426 |
| Nigeria | Yes                                   | SQUEAC               | 9/1/2014      | Katagum, Bauchi        | 0.195                   | 0.127 | 0.262 |
| Nigeria | Yes                                   | SQUEAC               | 9/1/2014      | Bichi, Kano            | 0.280                   | 0.179 | 0.381 |
| Nigeria | Yes                                   | SQUEAC               | 9/1/2014      | Fune, Yobe             | 0.511                   | 0.421 | 0.601 |
| Nigeria | Yes                                   | SQUEAC               | 10/31/2014    | Song, Adamawa          | 0.276                   | 0.183 | 0.368 |
| Nigeria | Yes                                   | SQUEAC               | 10/31/2014    | Gombe, Gombe           | 0.273                   | 0.174 | 0.372 |

| <b>Country</b> | <b>Directly matched with prevalence data</b> | <b>Coverage survey type</b> | <b>Coverage Date</b> | <b>Coverage Location</b>                   | <b>Coverage Point Estimate</b> | <b>LCL</b> | <b>UCL</b> |
|----------------|----------------------------------------------|-----------------------------|----------------------|--------------------------------------------|--------------------------------|------------|------------|
| Nigeria        | Yes                                          | SQUEAC                      | 11/17/2014           | Binji and Wamako, Sokoto                   | 0.823                          | 0.755      | 0.891      |
| Nigeria        | Yes                                          | SQUEAC                      | 1/15/2015            | South sokoto, Sokoto                       | 0.395                          | 0.298      | 0.493      |
| Nigeria        | Yes                                          | SQUEAC                      | 1/25/2015            | Goronyo, Sokoto                            | 0.146                          | 0.092      | 0.201      |
| Somalia        | No                                           | SQUEAC                      | 3/31/2012            | Galkayo Rural                              | 0.422                          | 0.355      | 0.489      |
| Somalia        | No                                           | SQUEAC                      | 6/15/2013            | Garowe Camp                                | 0.850                          | 0.787      | 0.913      |
| Somalia        | No                                           | SQUEAC                      | 2/28/2014            | Beledweyne Rural                           | 0.705                          | 0.640      | 0.770      |
| Somalia        | No                                           | SQUEAC                      | 3/11/2015            | Mogadishu Urban                            | 0.532                          | 0.414      | 0.649      |
| Somalia        | No                                           | SQUEAC                      | 9/17/2015            | Daynille district                          | 0.534                          | 0.412      | 0.653      |
| Somalia        | No                                           | SQUEAC                      | 10/5/2015            | Baidoa district                            | 0.424                          | 0.337      | 0.519      |
| Somalia        | No                                           | SQUEAC                      | 10/25/2015           | Dollow district                            | 0.474                          | 0.374      | 0.571      |
| Somalia        | No                                           | SQUEAC                      | 10/31/2015           | Dhusamareb district                        | 0.419                          | 0.306      | 0.539      |
| Somalia        | No                                           | SQUEAC                      | 11/15/2015           | Lughaya Rural                              | 0.599                          | 0.461      | 0.737      |
| Somalia        | No                                           | SQUEAC                      | 10/4/2017            | Gabiley                                    | 0.523                          | 0.376      | 0.669      |
| Somalia        | No                                           | SQUEAC                      | 11/9/2017            | Bossaso district                           | 0.655                          | 0.555      | 0.742      |
| Somalia        | No                                           | SQUEAC                      | 12/1/2017            | Burao district                             | 0.534                          | 0.411      | 0.653      |
| South Sudan    | No                                           | SQUEAC                      | 2/1/2016             | Aweil East County, Northern Bahr-el-Ghazal | 0.344                          | 0.220      | 0.497      |
| South Sudan    | No                                           | SQUEAC                      | 3/1/2016             | Akobo East County, Jonglei State           | 0.445                          | 0.338      | 0.562      |
| South Sudan    | No                                           | SQUEAC                      | 5/1/2016             | Aweil North County, Lol State              | 0.435                          | 0.329      | 0.546      |
| Uganda         | No                                           | SQUEAC                      | 1/1/2015             | Karamoja Subregion                         | 0.490                          | 0.470      | 0.520      |
| Uganda         | No                                           | SLEAC                       | 6/1/2016             | Karamoja Subregion                         | 0.198                          | 0.122      | 0.294      |
| Yemen          | Yes                                          | SQUEAC                      | 9/1/2013             | Al Qanawis, Houdeidah Gov                  | 0.616                          | 0.515      | 0.717      |

Supplemental Table 3. Individual K Estimates

| Country     | Sub-national location                                                                 | Date     | IPC Phase | Prevalence estimate taken during hungry season | MAM treatment available | Acute emergency | SAM treatment admissions (n) | Coverage estimate (%); [*denotes country average] | Estimated incident cases (n) | Population (n) | Prevalence (%)  | K estimate        |
|-------------|---------------------------------------------------------------------------------------|----------|-----------|------------------------------------------------|-------------------------|-----------------|------------------------------|---------------------------------------------------|------------------------------|----------------|-----------------|-------------------|
| Afghanistan | Badghis province                                                                      | Feb-2016 | Phase 3   | No                                             | -                       | -               | 3124                         | 42.6 (32.6, 52.6)*                                | 7329                         | 80772          | 3.2 (2.2, 4.6)  | 2.8 (1.9, 4.3)    |
| Afghanistan | Balkh province                                                                        | Aug-2015 | -         | Yes                                            | -                       | -               | 3849                         | 42.6 (32.6, 52.6)*                                | 9030                         | 217684         | 2.5 (1.4, 4.4)  | 1.6 (0.9, 3.1)    |
| Afghanistan | Farah province                                                                        | Feb-2017 | -         | No                                             | -                       | -               | 2257                         | 42.6 (32.6, 52.6)*                                | 5295                         | 83447          | 2.7 (1.8, 4.2)  | 2.3 (1.4, 3.8)    |
| Afghanistan | Ghazni province                                                                       | Jan-2016 | Phase 2   | No                                             | -                       | -               | 6348                         | 42.6 (32.6, 52.6)*                                | 14893                        | 200195         | 7.4 (5.9, 9.3)  | 1.0 (0.8, 1.4)    |
| Afghanistan | Ghor province                                                                         | Aug-2016 | Phase 3   | Yes                                            | -                       | -               | 6510                         | 42.6 (32.6, 52.6)*                                | 15273                        | 112384         | 8.4 (6.5, 10.7) | 1.6 (1.2, 2.3)    |
| Afghanistan | Helmand province; Garamser district                                                   | Mar-2015 | Phase 2   | No                                             | -                       | -               | 1233                         | 42.6 (32.6, 52.6)*                                | 2893                         | 17374          | 3.5 (2.9, 4.4)  | 4.7 (3.5, 6.5)    |
| Afghanistan | Kapisa province                                                                       | Oct-2016 | Phase 3   | No                                             | -                       | -               | 590                          | 42.6 (32.6, 52.6)*                                | 1384                         | 71790          | 5.5 (4.2, 7.2)  | 0.4 (0.2, 0.5)    |
| Afghanistan | Khost province; Matoon (Khost), Tanya and Mandozi (Ismail khail) districts            | Jun-2015 | Phase 3   | No                                             | -                       | -               | 2524                         | 42.6 (32.6, 52.6)*                                | 5921                         | 41828          | 3.3 (2.4, 4.4)  | 4.3 (3.0, 6.4)    |
| Afghanistan | Laghman province; Mehterlam, Alingar, Alishing, Dawlat shah, Qarghayi districts       | Dec-2015 | -         | No                                             | -                       | -               | 6312                         | 42.6 (32.6, 52.6)*                                | 14808                        | 70676          | 5.7 (4.4, 7.4)  | 3.7 (2.6, 5.3)    |
| Afghanistan | Nangarhar province                                                                    | Nov-2016 | Phase 2   | No                                             | -                       | -               | 23629                        | 42.6 (32.6, 52.6)*                                | 55435                        | 249037         | 1.0 (0.5, 2.1)  | 22.4 (10.2, 48.6) |
| Afghanistan | Nangarhar Province; Jalalabad, Surkhrod, Kama, Behsud, and Kuzkunar (Khewa) districts | Dec-2014 | Phase 2   | No                                             | -                       | -               | 7252                         | 52.6 (41.6, 63.4)                                 | 13787                        | 97873          | 4.9 (3.6, 6.6)  | 2.9 (2.1, 4.2)    |
| Afghanistan | Nuristan province; Parun, Noorgram, and Wama districts                                | Aug-2015 | Phase 3   | Yes                                            | -                       | -               | 840                          | 42.6 (32.6, 52.6)*                                | 1971                         | 9369           | 8.7 (6.9, 10.9) | 2.4 (1.8, 3.5)    |

| Country      | Sub-national location                                                                               | Date     | IPC Phase | Prevalence estimate taken during hungry season | MAM treatment available | Acute emergency | SAM treatment admissions (n) | Coverage estimate (%); [*denotes country average] | Estimated incident cases (n) | Population (n) | Prevalence (%) | K estimate       |
|--------------|-----------------------------------------------------------------------------------------------------|----------|-----------|------------------------------------------------|-------------------------|-----------------|------------------------------|---------------------------------------------------|------------------------------|----------------|----------------|------------------|
| Afghanistan  | Paktika province; Mata Khan, Sharana, Yahakhail, Sar Hawza, and Khair kot (Zarghon Shair) districts | May-2015 | Phase 3   | No                                             | -                       | -               | 3477                         | 42.6 (32.6, 52.6)*                                | 8157                         | 29254          | 3.5 (2.5, 4.9) | 8.0 (5.3, 12.1)  |
| Afghanistan  | Paktya province; Chamkani, Ahmad abad, Said karam and Gardez districts                              | Jun-2015 | -         | No                                             | -                       | -               | 3960                         | 53.3 (42.5, 64.4)                                 | 7430                         | 35878          | 2.4 (1.6, 3.5) | 8.7 (5.6, 13.2)  |
| Afghanistan  | Panjshir province                                                                                   | Apr-2016 | Phase 2   | No                                             | -                       | -               | 212                          | 42.6 (32.6, 52.6)*                                | 497                          | 24984          | 5.5 (4.2, 7.3) | 0.4 (0.3, 0.5)   |
| Afghanistan  | Parwan province                                                                                     | Sep-2016 | Phase 2   | Yes                                            | -                       | -               | 1835                         | 42.6 (32.6, 52.6)*                                | 4305                         | 108334         | 7.0 (5.4, 9.1) | 0.6 (0.4, 0.8)   |
| Angola       | Cubal & Ganda Municipalities                                                                        | Mar-2017 | -         | Yes                                            | Yes                     | No              | 3401                         | 26.2 (13.9, 42.0)                                 | 12981                        | 93283          | 2.2 (1.3, 3.6) | 6.4 (3.1, 14.5)  |
| Burkina Faso | Boucle du Mouhoun Region                                                                            | Sep-2016 | Phase 1   | -                                              | -                       | -               | 9058                         | 36.7 (26.2, 47.5)*                                | 24648                        | 319113         | 2.1 (1.3, 3.2) | 3.7 (2.2, 6.7)   |
| Burkina Faso | Boucle du Mouhoun Region                                                                            | Sep-2017 | Phase 1   | -                                              | -                       | -               | 8467                         | 36.7 (26.2, 47.5)*                                | 23040                        | 324708         | 1.5 (1.1, 2.1) | 4.6 (3.1, 7.4)   |
| Burkina Faso | Cascades Region                                                                                     | Sep-2016 | Phase 1   | -                                              | -                       | -               | 3367                         | 36.7 (26.2, 47.5)*                                | 9162                         | 122073         | 1.9 (1.0, 3.5) | 4.0 (2.1, 8.0)   |
| Burkina Faso | Cascades Region                                                                                     | Sep-2017 | Phase 1   | -                                              | -                       | -               | 3023                         | 36.7 (26.2, 47.5)*                                | 8226                         | 125204         | 2.2 (1.4, 3.4) | 3.0 (1.8, 5.3)   |
| Burkina Faso | Centre Est Region                                                                                   | Sep-2016 | Phase 1   | -                                              | -                       | -               | 5010                         | 36.7 (26.2, 47.5)*                                | 13633                        | 263783         | 1.4 (0.7, 2.6) | 3.8 (1.9, 8.4)   |
| Burkina Faso | Centre Est Region                                                                                   | Sep-2017 | Phase 1   | -                                              | -                       | -               | 3955                         | 36.7 (26.2, 47.5)*                                | 10762                        | 269167         | 1.8 (1.2, 2.8) | 2.2 (1.4, 3.9)   |
| Burkina Faso | Region Centre Nord                                                                                  | Sep-2016 | Phase 1   | -                                              | -                       | -               | 9874                         | 36.7 (26.2, 47.5)*                                | 26868                        | 282362         | 0.7 (0.3, 1.7) | 13.0 (5.1, 31.5) |
| Burkina Faso | Region Centre Nord                                                                                  | Sep-2017 | Phase 1   | -                                              | -                       | -               | 9455                         | 36.7 (26.2, 47.5)*                                | 25728                        | 287866         | 1.7 (1.1, 2.7) | 5.2 (3.0, 8.9)   |
| Burkina Faso | Region Centre Ouest                                                                                 | Sep-2016 | Phase 1   | -                                              | -                       | -               | 10066                        | 36.7 (26.2, 47.5)*                                | 27391                        | 263377         | 1.4 (0.8, 2.6) | 7.3 (3.5, 15.4)  |
| Burkina Faso | Region Centre Ouest                                                                                 | Sep-2017 | Phase 1   | -                                              | -                       | -               | 8605                         | 36.7 (26.2, 47.5)*                                | 23415                        | 268230         | 1.5 (0.8, 3.0) | 5.8 (2.8, 13.4)  |
| Burkina Faso | Centre Region                                                                                       | Sep-2016 | Phase 1   | -                                              | -                       | -               | 3544                         | 36.7 (26.2, 47.5)*                                | 9644                         | 326885         | 1.7 (0.9, 3.5) | 1.7 (0.9, 3.5)   |

| Country      | Sub-national location    | Date     | IPC Phase | Prevalence estimate taken during hungry season | MAM treatment available | Acute emergency | SAM treatment admissions (n) | Coverage estimate (%); [*denotes country average] | Estimated incident cases (n) | Population (n) | Prevalence (%) | K estimate        |
|--------------|--------------------------|----------|-----------|------------------------------------------------|-------------------------|-----------------|------------------------------|---------------------------------------------------|------------------------------|----------------|----------------|-------------------|
| Burkina Faso | Centre Region            | Sep-2017 | Phase 1   | -                                              | -                       | -               | 4525                         | 36.7 (26.2, 47.5)*                                | 12313                        | 336474         | 3.2 (1.5, 6.6) | 1.1 (0.5, 2.7)    |
| Burkina Faso | Centre Sud Region        | Sep-2016 | Phase 1   | -                                              | -                       | -               | 1786                         | 36.7 (26.2, 47.5)*                                | 4860                         | 137958         | 0.2 (0.0, 1.3) | 18.5 (2.2, 141.3) |
| Burkina Faso | Centre Sud Region        | Sep-2017 | Phase 1   | -                                              | -                       | -               | 1664                         | 36.7 (26.2, 47.5)*                                | 4528                         | 140340         | 1.8 (1.1, 2.8) | 1.8 (1.1, 3.1)    |
| Burkina Faso | Countrywide              | Sep-2011 | Phase 2   | -                                              | -                       | -               | 54613                        | 28.9 (17.1, 41.7)                                 | 188931                       | 2783611        | 2.6 (2.3, 3.0) | 2.6 (1.8, 4.5)    |
| Burkina Faso | Countrywide              | Sep-2012 | Phase 1   | -                                              | -                       | -               | 91891                        | 37.8 (26.5, 49.0)                                 | 243171                       | 2860908        | 2.3 (2.1, 2.5) | 3.7 (2.8, 5.4)    |
| Burkina Faso | Countrywide              | Sep-2013 | Phase 1   | -                                              | -                       | -               | 104582                       | 40.9 (30.6, 51.3)                                 | 255551                       | 2921111        | 2.0 (1.6, 2.3) | 4.5 (3.4, 6.4)    |
| Burkina Faso | Countrywide              | Sep-2014 | Phase 2   | -                                              | -                       | -               | 116262                       | 36.7 (26.2, 47.5)*                                | 316363                       | 2982797        | 1.8 (1.5, 2.1) | 5.8 (4.3, 8.4)    |
| Burkina Faso | Countrywide              | Nov-2015 | Phase 1   | -                                              | -                       | -               | 103542                       | 48.8 (38.1, 59.5)                                 | 212327                       | 3044336        | 2.3 (2.1, 2.6) | 3.0 (2.4, 4.0)    |
| Burkina Faso | Est Region               | Sep-2016 | Phase 1   | -                                              | -                       | -               | 11384                        | 36.7 (26.2, 47.5)*                                | 30977                        | 307976         | 3.0 (2.0, 4.3) | 3.4 (2.1, 5.5)    |
| Burkina Faso | Est Region               | Sep-2017 | Phase 1   | -                                              | -                       | -               | 11650                        | 43.5 (33.9, 53.1)                                 | 26774                        | 314967         | 2.3 (1.7, 3.0) | 3.7 (2.7, 5.4)    |
| Burkina Faso | Hauts Bassins Region     | Sep-2016 | Phase 1   | -                                              | -                       | -               | 7206                         | 36.7 (26.2, 47.5)*                                | 19608                        | 293835         | 0.9 (0.4, 1.9) | 7.8 (3.3, 17.6)   |
| Burkina Faso | Hauts Bassins Region     | Sep-2017 | Phase 1   | -                                              | -                       | -               | 6973                         | 36.7 (26.2, 47.5)*                                | 18974                        | 300234         | 2.1 (1.3, 3.2) | 3.1 (1.8, 5.5)    |
| Burkina Faso | Nord Region              | Sep-2016 | Phase 1   | -                                              | -                       | -               | 13197                        | 36.7 (26.2, 47.5)*                                | 35911                        | 271931         | 2.1 (1.3, 3.3) | 6.4 (3.7, 11.8)   |
| Burkina Faso | Nord Region              | Sep-2017 | Phase 1   | -                                              | -                       | -               | 11838                        | 36.7 (26.2, 47.5)*                                | 32213                        | 276892         | 1.7 (1.0, 2.8) | 6.8 (3.8, 12.5)   |
| Burkina Faso | Plateau Central Region   | Sep-2016 | Phase 1   | -                                              | -                       | -               | 4203                         | 36.7 (26.2, 47.5)*                                | 11437                        | 155695         | 1.3 (0.6, 2.6) | 5.8 (2.6, 13.7)   |
| Burkina Faso | Plateau Central Region   | Sep-2017 | Phase 1   | -                                              | -                       | -               | 3598                         | 36.7 (26.2, 47.5)*                                | 9791                         | 158430         | 1.3 (0.8, 2.2) | 4.6 (2.6, 8.6)    |
| Burkina Faso | Sahel Region             | Sep-2016 | Phase 1   | -                                              | -                       | -               | 13356                        | 36.7 (26.2, 47.5)*                                | 36343                        | 224193         | 2.1 (1.2, 3.6) | 7.9 (4.2, 14.8)   |
| Burkina Faso | Sahel Region             | Sep-2017 | Phase 1   | -                                              | -                       | -               | 12230                        | 36.7 (26.2, 47.5)*                                | 33279                        | 228938         | 4.5 (3.5, 5.8) | 3.2 (2.2, 4.9)    |
| Burkina Faso | Sud-Ouest Region         | Sep-2016 | Phase 1   | -                                              | -                       | -               | 4878                         | 36.7 (26.2, 47.5)*                                | 13274                        | 139045         | 2.7 (1.5, 5.0) | 3.5 (1.8, 6.9)    |
| Burkina Faso | Sud-Ouest Region         | Sep-2017 | Phase 1   | -                                              | -                       | -               | 4987                         | 36.7 (26.2, 47.5)*                                | 13570                        | 141686         | 1.6 (0.7, 3.8) | 6.0 (2.4, 15.2)   |
| Burundi      | Gashoho District         | Jul-2013 | Phase 2   | -                                              | -                       | -               | 1012                         | 42.5 (35.4, 49.4)*                                | 2381                         | 13218          | 0.6 (0.1, 2.4) | 30.1 (7.0, 106.4) |
| Chad         | Région de Bahr el Ghazel | Jan-2014 | Phase 2   | No                                             | -                       | -               | 12678                        | 41.5 (27.9, 55.2)                                 | 30549                        | 54576          | 2.6 (1.5, 4.4) | 21.9 (11.7, 44.2) |
| Chad         | Région de Barh El Gazal  | Aug-2016 | Phase 3   | Yes                                            | -                       | -               | 33038                        | 37.0 (26.7, 48.1)*                                | 89243                        | 57475          | 2.7 (1.8, 4.1) | 57.5 (34.2, 98.0) |
| Chad         | Région de Batha          | Jan-2014 | Phase 2   | No                                             | -                       | -               | 12621                        | 19.7 (10.9, 28.5)                                 | 64095                        | 111353         | 5.3 (3.5, 7.8) | 10.9 (6.3, 21.6)  |

| Country | Sub-national location        | Date     | IPC Phase | Prevalence estimate taken during hungry season | MAM treatment available | Acute emergency | SAM treatment admissions (n) | Coverage estimate (%); [*denotes country average] | Estimated incident cases (n) | Population (n) | Prevalence (%)  | K estimate          |
|---------|------------------------------|----------|-----------|------------------------------------------------|-------------------------|-----------------|------------------------------|---------------------------------------------------|------------------------------|----------------|-----------------|---------------------|
| Chad    | Région de Batha              | Aug-2016 | Phase 3   | Yes                                            | -                       | -               | 47821                        | 37.0 (26.7, 48.1)*                                | 129176                       | 117269         | 5.4 (3.8, 7.7)  | 20.3 (13.1, 33.1)   |
| Chad    | Région de Guera              | Jan-2014 | Phase 1   | No                                             | -                       | -               | 12069                        | 36.3 (26.6, 45.9)                                 | 33271                        | 116936         | 1.9 (1.0, 3.4)  | 15.3 (7.6, 29.6)    |
| Chad    | Région de Guéra              | Aug-2016 | Phase 2   | Yes                                            | -                       | -               | 43119                        | 37.0 (26.7, 48.1)*                                | 116474                       | 123148         | 4.0 (2.4, 6.5)  | 23.6 (13.5, 42.3)   |
| Chad    | Région de Hadjer Lamis       | Jan-2014 | Phase 1   | No                                             | -                       | -               | 9028                         | 40.3 (30.3, 50.3)                                 | 22405                        | 118409         | 2.7 (1.6, 4.5)  | 7.1 (3.9, 12.5)     |
| Chad    | Région de Hadjer Lamis       | Aug-2016 | Phase 1   | Yes                                            | -                       | -               | 29741                        | 37.0 (26.7, 48.1)*                                | 80337                        | 124700         | 4.1 (2.9, 5.8)  | 15.5 (10.0, 24.9)   |
| Chad    | Région de Kanem              | Jan-2014 | Phase 2   | No                                             | -                       | -               | 23891                        | 36.3 (26.9, 47.2)                                 | 65725                        | 74942          | 1.8 (1.0, 3.2)  | 49.8 (25.6, 99.3)   |
| Chad    | Région de Kanem              | Aug-2016 | Phase 3   | Yes                                            | -                       | -               | 77776                        | 37.0 (26.7, 48.1)*                                | 210091                       | 78923          | 1.8 (0.8, 3.7)  | 149.4 (66.9, 351.4) |
| Chad    | Région de Lac                | Jan-2014 | Phase 1   | No                                             | -                       | -               | 12651                        | 37.0 (26.7, 48.1)*                                | 34173                        | 95353          | 2.4 (1.4, 3.9)  | 15.2 (8.3, 26.7)    |
| Chad    | Région de Lac                | Aug-2016 | Phase 3   | Yes                                            | -                       | -               | 55407                        | 37.0 (26.7, 48.1)*                                | 149667                       | 100418         | 8.0 (5.5, 11.5) | 18.7 (12.0, 29.2)   |
| Chad    | Région de Logone occidentale | Aug-2016 | Phase 1   | Yes                                            | -                       | -               | 2892                         | 37.0 (26.7, 48.1)*                                | 7812                         | 152098         | 5.6 (4.1, 7.7)  | 0.9 (0.6, 1.5)      |
| Chad    | Région de Logone orientale   | Aug-2016 | Phase 1   | Yes                                            | -                       | -               | 7340                         | 37.0 (26.7, 48.1)*                                | 19827                        | 172563         | 2.1 (1.3, 3.5)  | 5.4 (3.0, 10.1)     |
| Chad    | Région de Mandoul            | Aug-2016 | Phase 1   | Yes                                            | -                       | -               | 2877                         | 37.0 (26.7, 48.1)*                                | 7771                         | 141720         | 4.9 (3.5, 6.7)  | 1.1 (0.7, 1.8)      |
| Chad    | Région de Moyen Chari        | Aug-2016 | Phase 1   | Yes                                            | -                       | -               | 1141                         | 37.0 (26.7, 48.1)*                                | 3082                         | 129943         | 3.5 (2.4, 5.1)  | 0.7 (0.4, 1.2)      |
| Chad    | Région de N'Djamena          | Jan-2014 | Phase 1   | No                                             | -                       | -               | 16820                        | 37.0 (26.7, 48.1)*                                | 45435                        | 208573         | 0.9 (0.4, 2.2)  | 23.3 (9.4, 54.9)    |
| Chad    | Région de Ndjamen            | Aug-2016 | Phase 1   | Yes                                            | -                       | -               | 62231                        | 37.0 (26.7, 48.1)*                                | 168100                       | 219653         | 3.1 (2.3, 4.2)  | 24.8 (16.0, 37.9)   |
| Chad    | Région de Ouaddai            | Jan-2014 | Phase 1   | No                                             | -                       | -               | 17077                        | 37.0 (26.7, 48.1)*                                | 46129                        | 135285         | 1.6 (0.8, 3.4)  | 20.8 (9.6, 48.1)    |
| Chad    | Région de Ouaddaï            | Aug-2016 | Phase 2   | Yes                                            | -                       | -               | 54662                        | 37.0 (26.7, 48.1)*                                | 147655                       | 142472         | 3.5 (2.5, 4.9)  | 29.5 (19.3, 46.7)   |
| Chad    | Région de Salamat            | Jan-2014 | Phase 1   | No                                             | -                       | -               | 8876                         | 43.1 (32.6, 53.6)                                 | 20610                        | 64759          | 3.7 (2.7, 5.1)  | 8.6 (5.6, 13.4)     |
| Chad    | Région de Salamat            | Aug-2016 | Phase 1   | Yes                                            | -                       | -               | 29668                        | 37.0 (26.7, 48.1)*                                | 80140                        | 68199          | 3.0 (2.1, 4.2)  | 39.6 (25.8, 64.2)   |
| Chad    | Région de Sila               | Jan-2014 | Phase 1   | No                                             | -                       | -               | 8948                         | 40.9 (29.9, 51.9)                                 | 21859                        | 53470          | 4.1 (2.8, 6.1)  | 9.9 (6.3, 16.8)     |
| Chad    | Région de Sila               | Aug-2016 | Phase 3   | Yes                                            | -                       | -               | 31390                        | 37.0 (26.7, 48.1)*                                | 84792                        | 56310          | 2.6 (1.8, 3.7)  | 57.8 (35.7, 90.0)   |
| Chad    | Région de Wadi Fira          | Jan-2014 | Phase 2   | No                                             | -                       | -               | 10070                        | 36.4 (26.9, 46.0)                                 | 27627                        | 80831          | 1.5 (0.8, 2.8)  | 22.9 (11.7, 48.4)   |

| Country  | Sub-national location        | Date     | IPC Phase | Prevalence estimate taken during hungry season | MAM treatment available | Acute emergency | SAM treatment admissions (n) | Coverage estimate (%); [*denotes country average] | Estimated incident cases (n) | Population (n) | Prevalence (%) | K estimate        |
|----------|------------------------------|----------|-----------|------------------------------------------------|-------------------------|-----------------|------------------------------|---------------------------------------------------|------------------------------|----------------|----------------|-------------------|
| Chad     | Région de Wadi Fira          | Aug-2016 | Phase 3   | Yes                                            | -                       | -               | 36296                        | 37.0 (26.7, 48.1)*                                | 98044                        | 85125          | 4.4 (3.1, 6.2) | 26.1 (16.6, 42.6) |
| DRC      | Kalomba health zone          | Oct-2015 | -         | Yes                                            | No                      | No              | 2262                         | 37.9 (28.2, 47.5)                                 | 5973                         | 25434          | 2.3 (1.3, 4.0) | 10.2 (5.4, 19.3)  |
| DRC      | Banyakiri health zone        | Jan-2016 | -         | No                                             | -                       | -               | 1514                         | 34.2 (23.9, 44.6)*                                | 4427                         | 37444          | 5.4 (4.1, 7.2) | 2.2 (1.4, 3.4)    |
| DRC      | Banyakiri health zone        | Sep-2017 | Phase 1   | Yes                                            | -                       | -               | 1985                         | 34.2 (23.9, 44.6)*                                | 5804                         | 41737          | 2.2 (1.4, 3.6) | 6.2 (3.6, 11.6)   |
| Ethiopia | Abaala Woreda                | May-2015 | Phase 2   | Yes                                            | Yes                     | No              | 478                          | 48.8 (37.4, 60.4)*                                | 979                          | 7072           | 2.6 (1.6, 4.2) | 5.4 (3.2, 9.6)    |
| Ethiopia | Abaala Woreda                | Dec-2016 | Phase 2   | Yes                                            | Yes                     | No              | 269                          | 48.8 (37.4, 60.4)*                                | 551                          | 7143           | 0.7 (0.3, 2.0) | 10.4 (4.0, 28.6)  |
| Ethiopia | Adaar Woreda                 | May-2015 | Phase 2   | Yes                                            | Yes                     | Yes             | 1422                         | 48.8 (37.4, 60.4)*                                | 2913                         | 8811           | 2.5 (1.5, 4.3) | 13.1 (7.3, 24.0)  |
| Ethiopia | Adaar Woreda                 | Oct-2016 | Phase 2   | No                                             | Yes                     | Yes             | 627                          | 48.8 (37.4, 60.4)*                                | 1284                         | 8899           | 1.3 (0.6, 2.9) | 11.2 (4.9, 25.8)  |
| Ethiopia | Bona Zuria Woreda            | May-2015 | Phase 1   | Yes                                            | No                      | No              | 1109                         | 48.8 (37.4, 60.4)*                                | 2272                         | 20761          | 3.3 (2.1, 5.2) | 3.3 (2.0, 5.7)    |
| Ethiopia | Bona Zuria Woreda            | Oct-2016 | Phase 1   | No                                             | No                      | No              | 501                          | 48.8 (37.4, 60.4)*                                | 1026                         | 20969          | 1.1 (0.5, 2.3) | 4.6 (2.0, 10.8)   |
| Ethiopia | Bulehora Woreda Dessie Zuria | Mar-2014 | Phase 2   | No                                             | No                      | No              | 1422                         | 48.8 (37.4, 60.4)*                                | 2913                         | 55796          | 1.0 (0.4, 2.3) | 5.5 (2.2, 13.7)   |
| Ethiopia | Woreda                       | May-2015 | Phase 2   | No                                             | Yes                     | No              | 525                          | 48.8 (37.4, 60.4)*                                | 1075                         | 21903          | 1.4 (0.6, 3.1) | 3.5 (1.5, 8.1)    |
| Ethiopia | Gubalafto Woreda             | May-2015 | Phase 2   | No                                             | Yes                     | Yes             | 409                          | 48.8 (37.4, 60.4)*                                | 838                          | 16821          | 1.4 (0.6, 3.3) | 3.6 (1.4, 8.9)    |
| Ethiopia | Hadelela Woreda              | May-2015 | Phase 2   | Yes                                            | Yes                     | No              | 1128                         | 48.8 (37.4, 60.4)*                                | 2311                         | 5663           | 2.6 (1.4, 4.7) | 15.6 (8.5, 30.2)  |
| Ethiopia | Hadelela Woreda              | Nov-2016 | Phase 2   | Yes                                            | Yes                     | Yes             | 1217                         | 48.8 (37.4, 60.4)*                                | 2493                         | 5720           | 1.9 (0.9, 3.9) | 23.3 (10.6, 50.9) |
| Ethiopia | Halaba Woreda                | May-2015 | Phase 3   | Yes                                            | Yes                     | Yes             | 2258                         | 48.8 (37.4, 60.4)*                                | 4625                         | 42880          | 1.1 (0.5, 2.3) | 9.6 (4.5, 22.0)   |
| Ethiopia | Konso Woreda                 | May-2015 | Phase 1   | Yes                                            | Yes                     | No              | 1592                         | 48.8 (37.4, 60.4)*                                | 3261                         | 36967          | 1.4 (0.7, 2.8) | 6.3 (2.9, 12.8)   |
| Ethiopia | Meiso Woreda                 | May-2015 | Phase 3   | No                                             | Yes                     | Yes             | 2878                         | 48.8 (37.4, 60.4)*                                | 5895                         | 25284          | 2.1 (1.2, 3.5) | 11.2 (6.5, 20.3)  |
| Ethiopia | Meiso Woreda                 | Aug-2016 | Phase 3   | Yes                                            | Yes                     | Yes             | 1118                         | 50.9 (37.8, 63.7)                                 | 2196                         | 25538          | 2.2 (1.4, 3.6) | 3.9 (2.3, 7.0)    |
| Ethiopia | Midhega Tola Woreda          | May-2015 | Phase 3   | No                                             | Yes                     | Yes             | 1428                         | 48.8 (37.4, 60.4)*                                | 2925                         | 14319          | 2.4 (1.4, 4.2) | 8.4 (4.7, 15.7)   |
| Ethiopia | Midhega Tola Woreda          | Aug-2016 | Phase 3   | Yes                                            | Yes                     | Yes             | 951                          | 48.8 (37.4, 60.4)*                                | 1948                         | 14463          | 2.0 (1.1, 3.6) | 6.7 (3.7, 12.9)   |
| Ethiopia | Miyo Woreda                  | May-2015 | Phase 3   | No                                             | No                      | Yes             | 203                          | 48.8 (37.4, 60.4)*                                | 416                          | 9751           | 0.2 (0.0, 1.6) | 18.9 (2.4, 93.5)  |
| Ethiopia | Miyo Woreda                  | Aug-2016 | Phase 2   | Yes                                            | No                      | Yes             | 251                          | 48.8 (37.4, 60.4)*                                | 514                          | 9849           | 0.4 (0.1, 1.7) | 12.0 (2.7, 43.4)  |
| Ethiopia | Raya Azebo Woreda            | May-2015 | Phase 2   | No                                             | Yes                     | No              | 275                          | 48.8 (37.4, 60.4)*                                | 563                          | 20147          | 0.7 (0.2, 1.8) | 4.2 (1.5, 10.3)   |



| Country  | Sub-national location    | Date     | IPC Phase | Prevalence estimate taken during hungry season | MAM treatment available | Acute emergency | SAM treatment admissions (n) | Coverage estimate (%); [*denotes country average] | Estimated incident cases (n) | Population (n) | Prevalence (%)  | K estimate       |
|----------|--------------------------|----------|-----------|------------------------------------------------|-------------------------|-----------------|------------------------------|---------------------------------------------------|------------------------------|----------------|-----------------|------------------|
| Ethiopia | Raya Azebo Woreda        | Jul-2016 | Phase 3   | Yes                                            | Yes                     | No              | 283                          | 48.8 (37.4, 60.4)*                                | 580                          | 20349          | 1.3 (0.6, 2.5)  | 2.2 (1.1, 4.4)   |
| Ethiopia | Saesi Tsaeda Emba Woreda | May-2015 | Phase 2   | No                                             | Yes                     | Yes             | 405                          | 48.8 (37.4, 60.4)*                                | 830                          | 20788          | 1.5 (0.8, 2.9)  | 2.6 (1.3, 5.4)   |
| Ethiopia | Saesi Tsaeda Emba Woreda | Jul-2016 | Phase 3   | Yes                                            | Yes                     | Yes             | 307                          | 48.8 (37.4, 60.4)*                                | 629                          | 20997          | 1.1 (0.5, 2.4)  | 2.7 (1.2, 6.5)   |
| Ethiopia | Sekota Zuria Woreda      | May-2015 | Phase 3   | No                                             | Yes                     | Yes             | 1962                         | 42.2 (30.0, 54.3)                                 | 4652                         | 19466          | 3.0 (1.9, 4.7)  | 7.9 (4.7, 13.6)  |
| Ethiopia | Siraro Woreda            | May-2015 | Phase 3   | No                                             | Yes                     | Yes             | 3516                         | 48.8 (37.4, 60.4)*                                | 7202                         | 26916          | 1.8 (1.0, 3.2)  | 15.0 (7.8, 28.5) |
| Ethiopia | Siraro Woreda            | Aug-2016 | Phase 3   | Yes                                            | Yes                     | Yes             | 2703                         | 48.8 (37.4, 60.4)*                                | 5537                         | 27186          | 1.7 (0.9, 3.1)  | 12.3 (6.7, 24.1) |
| Ethiopia | Tankua Abergele Woreda   | May-2015 | Phase 3   | No                                             | Yes                     | Yes             | 329                          | 48.8 (37.4, 60.4)*                                | 674                          | 13573          | 1.0 (0.5, 2.0)  | 4.7 (2.3, 9.9)   |
| Ethiopia | Tankua Abergele Woreda   | Jul-2016 | Phase 3   | Yes                                            | Yes                     | Yes             | 398                          | 48.8 (37.4, 60.4)*                                | 815                          | 13709          | 1.2 (0.6, 2.3)  | 4.9 (2.5, 9.9)   |
| Ethiopia | Wenago Woreda            | May-2015 | Phase 1   | Yes                                            | No                      | No              | 1613                         | 48.8 (37.4, 60.4)*                                | 3304                         | 24371          | 1.1 (0.5, 2.4)  | 12.6 (5.7, 32.5) |
| Ghana    | Northern Region          | Dec-2013 | -         | No                                             | -                       | -               | 3574                         | 5.4 (0.2, 26.2)                                   | 65578                        | 406148         | 2.8 (2.0, 3.9)  | 5.8 (0.8, 30.8)  |
| Ghana    | Upper East Region        | Dec-2013 | -         | No                                             | -                       | -               | 1472                         | 25.9 (11.6, 50.2)                                 | 5694                         | 139516         | 2.7 (1.8, 4.1)  | 1.5 (0.7, 3.4)   |
| Ghana    | Upper West Region        | Dec-2013 | -         | No                                             | -                       | -               | 916                          | 7.7 (0.2, 36.2)                                   | 11896                        | 94036          | 3.1 (2.0, 4.7)  | 4.1 (0.5, 24.0)  |
| Kenya    | Garissa County           | May-2017 | Phase 3   | No                                             | -                       | -               | 2607                         | 48.8 (36.9, 60.8)*                                | 5340                         | 169560         | 1.9 (1.1, 3.1)  | 1.7 (1.0, 2.9)   |
| Kenya    | Isiolo County            | May-2012 | Phase 2   | No                                             | -                       | No              | 332                          | 42.0 (26.0, 58.0)                                 | 790                          | 19571          | 3.7 (2.5, 5.4)  | 1.1 (0.7, 2.0)   |
| Kenya    | Isiolo County            | Feb-2018 | Phase 3   | Yes                                            | -                       | -               | 678                          | 48.8 (36.9, 60.8)*                                | 1389                         | 23735          | 3.5 (2.3, 5.2)  | 1.7 (1.0, 2.9)   |
| Kenya    | Kajiado County           | Jan-2018 | Phase 3   | -                                              | -                       | -               | 2117                         | 48.8 (36.9, 60.8)*                                | 4337                         | 130965         | 3.1 (2.0, 4.8)  | 1.1 (0.7, 1.8)   |
| Kenya    | Kitui District           | Apr-2011 | Phase 2   | No                                             | -                       | Yes             | 1022                         | 48.8 (36.9, 60.8)*                                | 2094                         | 135601         | 1.2 (0.6, 2.3)  | 1.3 (0.6, 3.0)   |
| Kenya    | Laikipia District        | Aug-2012 | Phase 2   | No                                             | -                       | No              | 404                          | 41.9 (30.9, 52.9)                                 | 964                          | 69916          | 4.7 (3.1, 6.9)  | 0.3 (0.2, 0.5)   |
| Kenya    | Laisamis Subcounty       | May-2017 | Phase 3   | No                                             | -                       | -               | 762                          | 54.6 (41.9, 67.3)                                 | 1395                         | 8798           | 7.1 (5.0, 10.0) | 2.2 (1.5, 3.5)   |
| Kenya    | Makueni District         | Apr-2011 | Phase 2   | No                                             | -                       | Yes             | 1152                         | 48.8 (36.9, 60.8)*                                | 2360                         | 118438         | 0.3 (0.1, 1.4)  | 5.7 (1.4, 19.0)  |
| Kenya    | Makueni District         | Mar-2012 | Phase 2   | No                                             | -                       | No              | 405                          | 48.8 (36.9, 60.8)*                                | 830                          | 120806         | 0.4 (0.1, 1.6)  | 1.7 (0.4, 6.4)   |
| Kenya    | Mandera County           | May-2017 | Phase 3   | No                                             | -                       | -               | 7720                         | 48.8 (36.9, 60.8)*                                | 15814                        | 279151         | 6.0 (4.6, 7.9)  | 0.9 (0.7, 1.4)   |
| Kenya    | Moyale Subcounty         | May-2017 | Phase 3   | No                                             | -                       | -               | 841                          | 48.8 (36.9, 60.8)*                                | 1723                         | 11594          | 1.4 (0.6, 3.3)  | 10.6 (4.2, 26.9) |
| Kenya    | Mwingi District          | Oct-2009 | Phase 4   | -                                              | -                       | No              | 1484                         | 48.8 (36.9, 60.8)*                                | 3040                         | 45439          | 2.0 (1.2, 3.3)  | 3.4 (1.9, 5.7)   |

| Country | Sub-national location     | Date     | IPC Phase | Prevalence estimate taken during hungry season | MAM treatment available | Acute emergency | SAM treatment admissions (n) | Coverage estimate (%); [*denotes country average] | Estimated incident cases (n) | Population (n) | Prevalence (%)    | K estimate       |
|---------|---------------------------|----------|-----------|------------------------------------------------|-------------------------|-----------------|------------------------------|---------------------------------------------------|------------------------------|----------------|-------------------|------------------|
| Kenya   | Mwingi District           | Apr-2011 | Phase 2   | -                                              | -                       | Yes             | 1010                         | 48.8 (36.9, 60.8)*                                | 2069                         | 48607          | 1.7 (0.9, 3.1)    | 2.5 (1.4, 4.8)   |
| Kenya   | Narok County              | Jan-2018 | Phase 2   | -                                              | -                       | -               | 869                          | 48.8 (36.9, 60.8)*                                | 1780                         | 162140         | 2.1 (1.2, 3.7)    | 0.5 (0.3, 0.9)   |
| Kenya   | North Horr Subcounty      | May-2017 | Phase 3   | -                                              | -                       | -               | 785                          | 48.8 (36.9, 60.8)*                                | 1608                         | 9501           | 6.9 (4.8, 9.8)    | 2.5 (1.6, 3.9)   |
| Kenya   | Saku Subcounty            | May-2017 | Phase 3   | -                                              | -                       | -               | 350                          | 53.0 (38.4, 67.6)                                 | 661                          | 8069           | 1.6 (0.6, 4.1)    | 5.2 (1.9, 13.7)  |
| Kenya   | Samburu County            | Jun-2017 | Phase 3   | -                                              | -                       | -               | 905                          | 48.8 (36.9, 60.8)*                                | 1854                         | 41190          | 4.4 (2.9, 6.5)    | 1.0 (0.6, 1.6)   |
| Kenya   | Turkana Central Subcounty | Feb-2017 | Phase 3   | -                                              | -                       | -               | 2921                         | 48.8 (36.9, 60.8)*                                | 5984                         | 15308          | 8.2 (6.5, 10.3)   | 4.7 (3.4, 6.7)   |
| Kenya   | Turkana Central Subcounty | Jun-2017 | Phase 3   | -                                              | -                       | -               | 2695                         | 48.8 (36.9, 60.8)*                                | 5521                         | 15308          | 9.5 (7.4, 11.9)   | 3.8 (2.7, 5.5)   |
| Kenya   | Turkana North Subcounty   | Feb-2017 | Phase 3   | -                                              | -                       | -               | 1253                         | 48.8 (36.9, 60.8)*                                | 2567                         | 15479          | 9.4 (7.4, 11.7)   | 1.8 (1.3, 2.5)   |
| Kenya   | Turkana North Subcounty   | Jun-2017 | Phase 3   | -                                              | -                       | -               | 834                          | 48.8 (36.9, 60.8)*                                | 1708                         | 15479          | 9.6 (7.6, 12.2)   | 1.1 (0.8, 1.6)   |
| Kenya   | Turkana South Subcounty   | Feb-2017 | Phase 3   | -                                              | -                       | -               | 2018                         | 48.8 (36.9, 60.8)*                                | 4134                         | 9984           | 7.2 (5.1, 10.1)   | 5.7 (3.8, 8.8)   |
| Kenya   | Turkana South Subcounty   | Jun-2017 | Phase 3   | -                                              | -                       | -               | 1876                         | 48.8 (36.9, 60.8)*                                | 3843                         | 9984           | 13.2 (10.6, 16.2) | 2.9 (2.2, 4.2)   |
| Kenya   | Turkana West Subcounty    | Feb-2017 | Phase 3   | -                                              | -                       | -               | 8347                         | 48.8 (36.9, 60.8)*                                | 17098                        | 30960          | 4.7 (3.1, 6.9)    | 11.8 (7.5, 20.0) |
| Kenya   | Turkana West Subcounty    | Jun-2017 | Phase 3   | -                                              | -                       | -               | 7846                         | 48.8 (36.9, 60.8)*                                | 16072                        | 30960          | 8.6 (6.5, 11.4)   | 6.0 (4.2, 8.9)   |
| Kenya   | West Pokot County         | Mar-2013 | Phase 2   | Yes                                            | -                       | No              | 2620                         | 21.7 (12.7, 30.7)                                 | 12074                        | 86110          | 1.3 (0.6, 2.7)    | 10.7 (4.9, 27.0) |
| Kenya   | West Pokot District       | May-2012 | Phase 2   | No                                             | -                       | No              | 1038                         | 33.5 (23.0, 44.0)                                 | 3098                         | 83117          | 2.5 (1.4, 4.6)    | 1.5 (0.8, 3.1)   |
| Liberia | Bomi County               | May-2016 | Phase 1   | No                                             | No                      | No              | 623                          | 24.8 (15.6, 37.0)*                                | 2512                         | 15906          | 2.4 (1.3, 4.6)    | 6.5 (3.0, 14.2)  |
| Liberia | Bong County               | May-2016 | Phase 1   | No                                             | No                      | No              | 1593                         | 24.8 (15.6, 37.0)*                                | 6423                         | 63055          | 1.7 (0.8, 3.6)    | 6.0 (2.6, 14.9)  |
| Liberia | Gbarpolu County           | May-2016 | Phase 1   | No                                             | No                      | No              | 376                          | 24.8 (15.6, 37.0)*                                | 1516                         | 25703          | 1.9 (1.0, 3.8)    | 3.1 (1.4, 7.1)   |
| Liberia | Grand Bassa County        | May-2016 | Phase 1   | No                                             | No                      | No              | 869                          | 24.8 (15.6, 37.0)*                                | 3504                         | 211439         | 3.0 (1.5, 5.6)    | 0.6 (0.3, 1.2)   |

| Country    | Sub-national location   | Date     | IPC Phase | Prevalence estimate taken during hungry season | MAM treatment available | Acute emergency | SAM treatment admissions (n) | Coverage estimate (%); [*denotes country average] | Estimated incident cases (n) | Population (n) | Prevalence (%) | K estimate        |
|------------|-------------------------|----------|-----------|------------------------------------------------|-------------------------|-----------------|------------------------------|---------------------------------------------------|------------------------------|----------------|----------------|-------------------|
| Liberia    | Grand Cape Mount County | May-2016 | Phase 1   | No                                             | No                      | No              | 591                          | 24.8 (15.6, 37.0)*                                | 2383                         | 15767          | 2.9 (1.6, 5.1) | 5.2 (2.4, 11.0)   |
| Liberia    | Grand Gedeh County      | May-2016 | Phase 1   | No                                             | No                      | No              | 577                          | 24.8 (15.6, 37.0)*                                | 2327                         | 10950          | 0.4 (0.1, 3.1) | 48.5 (5.3, 317.4) |
| Liberia    | Grand Kru County        | May-2016 | Phase 1   | No                                             | No                      | No              | 358                          | 24.8 (15.6, 37.0)*                                | 1444                         | 87360          | 1.9 (0.9, 4.2) | 0.9 (0.4, 2.2)    |
| Liberia    | Lofa County             | May-2016 | Phase 1   | No                                             | No                      | No              | 2073                         | 24.8 (15.6, 37.0)*                                | 8359                         | 41918          | 1.4 (0.5, 3.6) | 14.7 (4.7, 43.6)  |
| Liberia    | Margibi County          | May-2016 | Phase 1   | No                                             | No                      | Yes             | 827                          | 24.8 (15.6, 37.0)*                                | 3335                         | 23684          | 3.4 (1.6, 7.0) | 4.2 (1.8, 9.7)    |
| Liberia    | Maryland County         | May-2016 | Phase 1   | No                                             | No                      | No              | 942                          | 24.8 (15.6, 37.0)*                                | 3798                         | 52349          | 1.5 (0.6, 4.0) | 4.8 (1.7, 14.2)   |
| Liberia    | Montserrado County      | May-2016 | Phase 1   | No                                             | No                      | No              | 6023                         | 24.8 (15.6, 37.0)*                                | 24286                        | 39693          | 1.9 (0.8, 4.2) | 32.4 (13.1, 76.3) |
| Liberia    | Nimba County            | May-2016 | Phase 1   | No                                             | No                      | No              | 1016                         | 24.8 (15.6, 37.0)*                                | 4097                         | 13521          | 1.1 (0.4, 3.0) | 26.4 (8.8, 72.1)  |
| Liberia    | River Gee County        | May-2016 | Phase 1   | No                                             | No                      | No              | 316                          | 24.8 (15.6, 37.0)*                                | 1274                         | 19396          | 0.4 (0.1, 3.1) | 14.8 (1.7, 62.0)  |
| Liberia    | Rivercess County        | May-2016 | Phase 1   | No                                             | No                      | No              | 459                          | 24.8 (15.6, 37.0)*                                | 1851                         | 12629          | 1.6 (0.6, 4.2) | 9.3 (3.0, 24.9)   |
| Liberia    | Sinoe County            | May-2016 | Phase 1   | No                                             | No                      | No              | 375                          | 24.8 (15.6, 37.0)*                                | 1512                         | 24027          | 0.8 (0.2, 3.2) | 7.7 (1.7, 28.2)   |
| Madagascar | District d'Amboasary    | Mar-2017 | Phase 3   | Yes                                            | Yes                     | Yes             | 2930                         | 28.7 (20.9, 37.6)*                                | 10209                        | 52665          | 2.5 (1.6, 3.9) | 7.6 (4.6, 13.0)   |
| Madagascar | District d'Ambovombe    | Apr-2017 | Phase 2   | No                                             | Yes                     | Yes             | 3929                         | 28.7 (20.9, 37.6)*                                | 13690                        | 53334          | 2.4 (1.6, 3.7) | 10.6 (6.5, 17.7)  |
| Madagascar | District d'Ampanihy     | Apr-2017 | Phase 3   | No                                             | Yes                     | Yes             | 3270                         | 28.7 (20.9, 37.6)*                                | 11394                        | 62357          | 1.7 (1.1, 2.5) | 10.8 (6.5, 17.9)  |
| Madagascar | District de Bekily      | Apr-2017 | Phase 2   | No                                             | Yes                     | Yes             | 1794                         | 28.7 (20.9, 37.6)*                                | 6251                         | 33059          | 2.3 (1.5, 3.6) | 8.1 (4.8, 13.8)   |
| Madagascar | District de Beloha      | Feb-2017 | Phase 3   | Yes                                            | Yes                     | Yes             | 1665                         | 28.7 (20.9, 37.6)*                                | 5801                         | 21991          | 3.8 (2.6, 5.3) | 7.0 (4.6, 11.0)   |
| Madagascar | District de Betioky     | May-2017 | Phase 3   | No                                             | Yes                     | Yes             | 1259                         | 28.7 (20.9, 37.6)                                 | 4387                         | 46504          | 1.9 (1.2, 3.0) | 4.9 (2.8, 8.3)    |
| Madagascar | District de Taolagnaro  | Mar-2017 | Phase 3   | Yes                                            | No                      | Yes             | 1608                         | 28.7 (20.9, 37.6)*                                | 5603                         | 62434          | 1.2 (0.6, 2.5) | 7.6 (3.4, 15.8)   |
| Madagascar | District de Tsihombe    | Mar-2017 | Phase 3   | Yes                                            | Yes                     | Yes             | 2296                         | 28.7 (20.9, 37.6)*                                | 8000                         | 22992          | 2.2 (1.4, 3.4) | 15.8 (9.3, 28.6)  |
| Mali       | Région de Bamako        | Jul-2014 | Phase 1   | Yes                                            | -                       | -               | 5721                         | 34.9 (25.7, 44.4)*                                | 16375                        | 357300         | 3.8 (2.6, 5.6) | 1.2 (0.7, 1.9)    |
| Mali       | Région de Bamako        | May-2015 | Phase 1   | No                                             | -                       | -               | 6971                         | 34.9 (25.7, 44.4)*                                | 19953                        | 364500         | 1.8 (1.0, 3.0) | 3.1 (1.7, 6.0)    |
| Mali       | Région de Bamako        | Jul-2016 | Phase 1   | Yes                                            | -                       | -               | 5183                         | 34.9 (25.7, 44.4)*                                | 14835                        | 372600         | 2.5 (1.7, 3.7) | 1.6 (1.0, 2.5)    |
| Mali       | Région de Bamako        | Aug-2017 | Phase 1   | Yes                                            | -                       | -               | 4073                         | 34.9 (25.7, 44.4)*                                | 11658                        | 380700         | 2.7 (1.9, 3.7) | 1.1 (0.7, 1.8)    |
| Mali       | Région de Gao           | May-2015 | Phase 2   | No                                             | -                       | -               | 10065                        | 34.9 (25.7, 44.4)*                                | 28809                        | 108900         | 2.5 (1.8, 3.7) | 10.4 (6.7, 16.9)  |
| Mali       | Région de Gao           | Jul-2016 | Phase 2   | Yes                                            | -                       | -               | 9700                         | 34.9 (25.7, 44.4)*                                | 27764                        | 111600         | 3.8 (2.7, 5.2) | 6.6 (4.4, 10.0)   |

| Country | Sub-national location | Date     | IPC Phase | Prevalence estimate taken during hungry season | MAM treatment available | Acute emergency | SAM treatment admissions (n) | Coverage estimate (%); [*denotes country average] | Estimated incident cases (n) | Population (n) | Prevalence (%) | K estimate       |
|---------|-----------------------|----------|-----------|------------------------------------------------|-------------------------|-----------------|------------------------------|---------------------------------------------------|------------------------------|----------------|----------------|------------------|
| Mali    | Région de Gao         | Aug-2017 | Phase 2   | Yes                                            | -                       | -               | 9441                         | 34.9 (25.7, 44.4)*                                | 27023                        | 114300         | 3.2 (2.1, 5.0) | 7.4 (4.4, 12.7)  |
| Mali    | Région de Kayes       | Jul-2014 | Phase 2   | Yes                                            | -                       | -               | 19143                        | 34.9 (25.0, 45.1)                                 | 54900                        | 393300         | 2.1 (1.2, 3.5) | 6.7 (3.6, 12.5)  |
| Mali    | Région de Kayes       | May-2015 | Phase 1   | No                                             | -                       | -               | 19222                        | 32.0 (21.4, 42.9)                                 | 60156                        | 401400         | 3.7 (2.7, 5.1) | 4.0 (2.6, 6.6)   |
| Mali    | Région de Kayes       | Jul-2016 | Phase 1   | Yes                                            | -                       | -               | 16642                        | 34.9 (25.7, 44.4)*                                | 47634                        | 410400         | 1.6 (0.9, 2.7) | 7.4 (3.9, 14.1)  |
| Mali    | Région de Kayes       | Aug-2017 | Phase 2   | Yes                                            | -                       | -               | 14646                        | 34.9 (25.7, 44.4)*                                | 41921                        | 419400         | 4.0 (3.1, 5.2) | 2.5 (1.8, 3.7)   |
| Mali    | Région de Kidal       | Aug-2017 | Phase 1   | Yes                                            | -                       | -               | 481                          | 34.9 (25.7, 44.4)*                                | 1377                         | 14400          | 1.2 (0.5, 3.2) | 8.0 (2.9, 22.2)  |
| Mali    | Région de Koulikoro   | Jul-2014 | Phase 2   | Yes                                            | -                       | -               | 24696                        | 29.3 (22.7, 36.0)                                 | 84203                        | 477900         | 3.2 (2.1, 4.8) | 5.5 (3.4, 8.9)   |
| Mali    | Région de Koulikoro   | May-2015 | Phase 1   | No                                             | -                       | -               | 26685                        | 44.4 (33.9, 55.0)                                 | 60064                        | 480600         | 2.8 (1.9, 4.3) | 4.4 (2.7, 7.3)   |
| Mali    | Région de Koulikoro   | Jul-2016 | Phase 1   | Yes                                            | -                       | -               | 18832                        | 34.9 (25.7, 44.4)*                                | 53902                        | 498600         | 2.1 (1.4, 3.1) | 5.2 (3.2, 8.5)   |
| Mali    | Région de Koulikoro   | Aug-2017 | Phase 2   | Yes                                            | -                       | -               | 16415                        | 34.9 (25.7, 44.4)*                                | 46984                        | 509400         | 2.8 (2.0, 3.9) | 3.3 (2.2, 5.2)   |
| Mali    | Région de Mopti       | Jul-2014 | Phase 2   | Yes                                            | -                       | -               | 19035                        | 29.5 (21.6, 37.7)                                 | 64423                        | 401400         | 3.0 (2.6, 3.4) | 5.4 (4.1, 7.7)   |
| Mali    | Région de Mopti       | May-2015 | Phase 1   | No                                             | -                       | -               | 27779                        | 34.9 (25.7, 44.4)*                                | 79511                        | 409500         | 2.0 (1.3, 3.2) | 9.6 (5.8, 16.9)  |
| Mali    | Région de Mopti       | Jul-2016 | Phase 1   | Yes                                            | -                       | -               | 24517                        | 34.9 (25.7, 44.4)*                                | 70174                        | 419400         | 2.8 (1.9, 4.2) | 6.0 (3.6, 10.2)  |
| Mali    | Région de Mopti       | Aug-2017 | Phase 2   | Yes                                            | -                       | -               | 24582                        | 38.5 (28.5, 48.4)                                 | 63913                        | 428400         | 1.8 (1.2, 2.8) | 8.2 (4.9, 13.3)  |
| Mali    | Région de Ségou       | Jul-2014 | Phase 1   | Yes                                            | -                       | -               | 24811                        | 41.9 (31.5, 52.3)                                 | 59196                        | 460800         | 3.1 (2.1, 4.6) | 4.1 (2.6, 6.6)   |
| Mali    | Région de Ségou       | May-2015 | Phase 1   | No                                             | -                       | -               | 26573                        | 36.5 (25.9, 47.1)                                 | 72846                        | 470700         | 1.6 (0.9, 2.8) | 9.8 (5.1, 18.1)  |
| Mali    | Région de Ségou       | Jul-2016 | Phase 1   | Yes                                            | -                       | -               | 21820                        | 34.9 (25.7, 44.4)*                                | 62454                        | 481500         | 5.0 (3.8, 6.6) | 2.6 (1.8, 3.9)   |
| Mali    | Région de Ségou       | Aug-2017 | Phase 1   | Yes                                            | -                       | -               | 20701                        | 34.9 (25.7, 44.4)*                                | 59252                        | 492300         | 3.6 (2.6, 5.1) | 3.3 (2.1, 5.2)   |
| Mali    | Région de Sikasso     | Jul-2014 | Phase 1   | Yes                                            | -                       | -               | 20133                        | 28.1 (20.2, 36.0)                                 | 71701                        | 521100         | 2.6 (2.3, 3.1) | 5.2 (3.9, 7.6)   |
| Mali    | Région de Sikasso     | May-2015 | Phase 1   | No                                             | -                       | -               | 20326                        | 34.9 (25.7, 44.4)*                                | 58178                        | 531900         | 3.6 (2.5, 5.0) | 3.1 (2.0, 4.7)   |
| Mali    | Région de Sikasso     | Jul-2016 | Phase 1   | Yes                                            | -                       | -               | 15770                        | 34.9 (25.7, 44.4)*                                | 45138                        | 544500         | 1.9 (1.2, 3.3) | 4.3 (2.4, 7.5)   |
| Mali    | Région de Sikasso     | Aug-2017 | Phase 1   | Yes                                            | -                       | -               | 13524                        | 34.9 (25.7, 44.4)*                                | 38709                        | 556200         | 2.6 (2.0, 3.4) | 2.7 (1.9, 4.0)   |
| Mali    | Région de Tombouctou  | Jul-2014 | Phase 2   | Yes                                            | -                       | -               | 9157                         | 18.8 (13.1, 22.8)                                 | 48707                        | 133200         | 3.4 (2.2, 5.2) | 10.9 (6.8, 19.9) |
| Mali    | Région de Tombouctou  | May-2015 | Phase 2   | No                                             | -                       | -               | 14892                        | 34.9 (25.7, 44.4)*                                | 42625                        | 135900         | 4.4 (3.3, 5.9) | 7.1 (4.8, 10.8)  |

| Country    | Sub-national location | Date     | IPC Phase | Prevalence estimate taken during hungry season | MAM treatment available | Acute emergency | SAM treatment admissions (n) | Coverage estimate (%); [*denotes country average] | Estimated incident cases (n) | Population (n) | Prevalence (%) | K estimate         |
|------------|-----------------------|----------|-----------|------------------------------------------------|-------------------------|-----------------|------------------------------|---------------------------------------------------|------------------------------|----------------|----------------|--------------------|
| Mali       | Région de Tombouctou  | Jul-2016 | Phase 2   | Yes                                            | -                       | -               | 12985                        | 34.9 (25.7, 44.4)*                                | 37166                        | 138600         | 4.4 (3.2, 6.1) | 6.0 (4.0, 9.2)     |
| Mali       | Région de Tombouctou  | Aug-2017 | Phase 2   | Yes                                            | -                       | -               | 11391                        | 34.9 (25.7, 44.4)*                                | 32604                        | 142200         | 2.9 (1.8, 4.6) | 7.9 (4.7, 13.1)    |
| Mauritania | Gorgol Wilaya         | Jun-2012 | -         | Yes                                            | -                       | -               | 2892                         | 32.1 (19.9, 46.3)                                 | 9009                         | 59914          | 1.2 (0.6, 2.6) | 12.1 (5.3, 30.5)   |
| Mauritania | Hodh el Gharbi Wilaya | Jun-2012 | -         | Yes                                            | -                       | -               | 911                          | 33.1 (20.8, 48.0)*                                | 2748                         | 51548          | 2.4 (1.5, 3.9) | 2.2 (1.2, 4.4)     |
| Myanmar    | Buthidung Township    | Sep-2015 | -         | Yes                                            | -                       | Yes             | 4996                         | 56.7 (48.3, 64.7)                                 | 8811                         | 48505          | 2.9 (1.7, 4.7) | 6.3 (3.7, 10.4)    |
| Myanmar    | Maungdaw Township     | Sep-2015 | -         | Yes                                            | -                       | Yes             | 6581                         | 29.7 (21.4, 37.9)                                 | 22158                        | 84302          | 5.4 (3.9, 7.5) | 4.9 (3.2, 7.8)     |
| Myanmar    | Pauktaw IDP camp      | Jul-2016 | -         | Yes                                            | -                       | Yes             | 422                          | 82.1 (71.6, 92.7)                                 | 514                          | 3946           | 1.5 (0.8, 2.8) | 8.7 (4.5, 17.7)    |
| Myanmar    | Sittwe Rural IDP      | Jul-2016 | -         | Yes                                            | -                       | Yes             | 2100                         | 65.3 (53.8, 76.7)                                 | 3216                         | 9741           | 0.9 (0.3, 2.4) | 36.5 (13.1, 100.1) |
| Myanmar    | Sittwe Urban IDP      | Jul-2016 | -         | Yes                                            | -                       | Yes             | 110                          | 61.1 (51.9, 70.2)*                                | 180                          | 390            | 0.7 (0.3, 2.0) | 60.0 (22.4, 174.8) |
| Niger      | Agadez Region         | Aug-2015 | Phase 1   | Yes                                            | Yes                     | -               | 7602                         | 43.9 (35.2, 52.6)                                 | 17335                        | 82411          | 2.9 (1.5, 5.6) | 7.2 (3.6, 13.6)    |
| Niger      | Diffa Region          | Aug-2015 | Phase 3   | Yes                                            | Yes                     | -               | 16577                        | 39.5 (30.3, 48.6)*                                | 41974                        | 107355         | 3.8 (2.3, 6.1) | 10.4 (6.3, 18.4)   |
| Niger      | Dosso Region          | Aug-2015 | Phase 1   | Yes                                            | Yes                     | -               | 31211                        | 39.5 (30.3, 48.6)*                                | 79029                        | 90830          | 6.1 (4.1, 8.9) | 14.3 (9.2, 22.4)   |
| Niger      | Maradi Region         | Aug-2015 | Phase 1   | Yes                                            | Yes                     | -               | 97523                        | 39.5 (30.3, 48.6)*                                | 246937                       | 737693         | 7.0 (5.2, 9.5) | 4.8 (3.3, 7.0)     |
| Niger      | Niamey Region         | Aug-2015 | Phase 1   | Yes                                            | Yes                     | -               | 7136                         | 39.5 (30.3, 48.6)*                                | 18069                        | 168128         | 4.3 (2.5, 7.3) | 2.5 (1.4, 4.7)     |
| Niger      | Tahoua Region         | Aug-2015 | Phase 2   | Yes                                            | Yes                     | -               | 69397                        | 39.5 (30.3, 48.6)*                                | 175719                       | 661278         | 5.0 (3.1, 7.9) | 5.4 (3.3, 9.4)     |
| Niger      | Tillabery Region      | Aug-2015 | Phase 2   | Yes                                            | Yes                     | -               | 36820                        | 56.3 (45.7, 66.9)                                 | 65391                        | 556099         | 2.8 (1.6, 4.7) | 4.2 (2.5, 7.2)     |
| Niger      | Zinder Region         | Aug-2015 | Phase 2   | Yes                                            | Yes                     | -               | 119326                       | 34.6 (25.2, 41.2)                                 | 344584                       | 752585         | 5.1 (3.4, 7.7) | 8.9 (5.9, 15.2)    |
| Niger      | Agadez Region         | Aug-2016 | Phase 2   | Yes                                            | Yes                     | -               | 6951                         | 39.5 (30.3, 48.6)*                                | 17601                        | 83808          | 2.5 (1.7, 3.7) | 8.4 (5.2, 13.5)    |
| Niger      | Diffa Region          | Aug-2016 | Phase 3   | Yes                                            | Yes                     | -               | 16731                        | 39.5 (30.3, 48.6)*                                | 42364                        | 106470         | 2.0 (1.6, 2.5) | 19.7 (14.6, 27.9)  |
| Niger      | Dosso Region          | Aug-2016 | Phase 1   | Yes                                            | Yes                     | -               | 28166                        | 39.5 (30.3, 48.6)*                                | 71319                        | 422546         | 1.4 (0.7, 2.8) | 11.8 (5.8, 25.0)   |
| Niger      | Maradi Region         | Aug-2016 | Phase 1   | Yes                                            | Yes                     | -               | 108988                       | 39.5 (30.3, 48.6)*                                | 275967                       | 761168         | 4.3 (2.8, 6.5) | 8.5 (5.3, 13.6)    |
| Niger      | Niamey Region         | Aug-2016 | Phase 1   | Yes                                            | Yes                     | -               | 8701                         | 39.5 (30.3, 48.6)*                                | 22032                        | 175640         | 0.5 (0.2, 1.3) | 25.7 (9.5, 78.2)   |
| Niger      | Tahoua Region         | Aug-2016 | Phase 2   | Yes                                            | Yes                     | -               | 73739                        | 39.5 (30.3, 48.6)*                                | 186714                       | 672595         | 1.3 (0.6, 2.7) | 22.1 (9.8, 52.4)   |
| Niger      | Tillabery Region      | Aug-2016 | Phase 1   | Yes                                            | Yes                     | -               | 38738                        | 39.5 (30.3, 48.6)*                                | 98088                        | 570674         | 2.9 (1.7, 4.7) | 6.0 (3.5, 10.3)    |

| Country | Sub-national location | Date     | IPC Phase | Prevalence estimate taken during hungry season | MAM treatment available | Acute emergency | SAM treatment admissions (n) | Coverage estimate (%); [*denotes country average] | Estimated incident cases (n) | Population (n) | Prevalence (%) | K estimate      |
|---------|-----------------------|----------|-----------|------------------------------------------------|-------------------------|-----------------|------------------------------|---------------------------------------------------|------------------------------|----------------|----------------|-----------------|
| Niger   | Zinder Region         | Aug-2016 | Phase 1   | Yes                                            | Yes                     | -               | 110378                       | 39.5 (30.3, 48.6)*                                | 279487                       | 776598         | 4.5 (2.9, 7.0) | 8.0 (4.6, 13.0) |
| Nigeria | Adamawa               | Jul-2013 | Phase 1   | Yes                                            | -                       | -               | 5218                         | 35.3 (26.3, 44.3)*                                | 14777                        | 599298         | 1.4 (0.7, 2.5) | 1.8 (0.9, 3.7)  |
| Nigeria | Adamawa               | Mar-2014 | Phase 2   | No                                             | -                       | -               | 6488                         | 27.6 (18.3, 36.8)                                 | 23549                        | 614220         | 2.0 (1.0, 3.9) | 2.0 (0.9, 4.4)  |
| Nigeria | Adamawa               | Jul-2015 | Phase 3   | Yes                                            | -                       | -               | 19301                        | 35.3 (26.3, 44.3)*                                | 54658                        | 629514         | 2.2 (1.0, 4.8) | 4.0 (1.7, 10.0) |
| Nigeria | Bauchi                | Jul-2013 | Phase 1   | Yes                                            | -                       | -               | 3511                         | 35.3 (26.3, 44.3)*                                | 9943                         | 996145         | 3.8 (2.6, 5.4) | 0.3 (0.2, 0.4)  |
| Nigeria | Bauchi                | Mar-2014 | Phase 1   | No                                             | -                       | -               | 10683                        | 19.5 (12.7, 26.2)                                 | 54917                        | 1020949        | 5.5 (4.1, 7.3) | 1.0 (0.6, 1.7)  |
| Nigeria | Bauchi                | Jul-2015 | Phase 1   | Yes                                            | -                       | -               | 17665                        | 35.3 (26.3, 44.3)*                                | 50025                        | 1046370        | 3.7 (2.5, 5.5) | 1.3 (0.8, 2.2)  |
| Nigeria | Borno                 | Aug-2010 | Phase 3   | Yes                                            | -                       | -               | 1362                         | 35.3 (26.3, 44.3)*                                | 3857                         | 789902         | 2.6 (1.5, 4.4) | 0.2 (0.1, 0.3)  |
| Nigeria | Borno                 | Dec-2010 | Phase 1   | No                                             | -                       | -               | 1362                         | 35.3 (26.3, 44.3)*                                | 3857                         | 789902         | 2.2 (1.2, 3.9) | 0.2 (0.1, 0.4)  |
| Nigeria | Borno                 | Feb-2012 | Phase 1   | No                                             | -                       | -               | 8262                         | 35.3 (26.3, 44.3)*                                | 23397                        | 829729         | 3.9 (2.7, 5.6) | 0.7 (0.5, 1.1)  |
| Nigeria | Borno                 | Oct-2012 | Phase 2   | No                                             | -                       | -               | 8262                         | 35.3 (26.3, 44.3)*                                | 23397                        | 829729         | 5.9 (4.3, 7.9) | 0.5 (0.3, 0.7)  |
| Nigeria | Borno                 | Oct-2013 | Phase 3   | No                                             | -                       | -               | 7058                         | 35.3 (26.3, 44.3)*                                | 19987                        | 850389         | 4.5 (3.2, 6.3) | 0.5 (0.3, 0.8)  |
| Nigeria | Borno                 | Mar-2014 | Phase 3   | No                                             | -                       | -               | 15504                        | 35.3 (26.3, 44.3)*                                | 43906                        | 871563         | 2.7 (1.6, 4.4) | 1.9 (1.1, 3.4)  |
| Nigeria | Borno                 | Jul-2015 | Phase 4   | Yes                                            | -                       | -               | 42514                        | 35.3 (26.3, 44.3)*                                | 120395                       | 893265         | 4.4 (3.0, 6.5) | 3.1 (1.9, 4.9)  |
| Nigeria | Gombe                 | Jul-2013 | Phase 1   | Yes                                            | -                       | -               | 6346                         | 35.3 (26.3, 44.3)*                                | 17971                        | 492303         | 1.1 (0.6, 2.1) | 3.3 (1.6, 7.1)  |
| Nigeria | Gombe                 | Mar-2014 | Phase 1   | No                                             | -                       | -               | 6681                         | 27.3 (17.4, 37.2)                                 | 24476                        | 504561         | 3.4 (2.3, 5.1) | 1.4 (0.8, 2.5)  |
| Nigeria | Gombe                 | Jul-2015 | Phase 1   | Yes                                            | -                       | -               | 11407                        | 35.3 (26.3, 44.3)*                                | 32303                        | 517124         | 4.4 (2.9, 6.7) | 1.4 (0.9, 2.3)  |
| Nigeria | Jigawa                | Aug-2010 | Phase 3   | Yes                                            | -                       | -               | 10107                        | 35.3 (26.3, 44.3)*                                | 28622                        | 872469         | 4.5 (3.1, 6.5) | 0.7 (0.5, 1.1)  |
| Nigeria | Jigawa                | Dec-2010 | Phase 2   | No                                             | -                       | -               | 10107                        | 35.3 (26.3, 44.3)*                                | 28622                        | 872469         | 7.1 (5.2, 9.5) | 0.5 (0.3, 0.7)  |
| Nigeria | Jigawa                | Jul-2011 | Phase 1   | Yes                                            | -                       | -               | 23375                        | 35.3 (26.3, 44.3)*                                | 66195                        | 894194         | 5.1 (3.7, 6.9) | 1.5 (1.0, 2.2)  |
| Nigeria | Jigawa                | Sep-2012 | Phase 2   | Yes                                            | -                       | -               | 40642                        | 35.3 (26.3, 44.3)*                                | 115094                       | 916459         | 5.0 (3.7, 6.7) | 2.5 (1.7, 3.8)  |
| Nigeria | Jigawa                | Aug-2013 | Phase 1   | Yes                                            | -                       | -               | 45412                        | 40.3 (30.7, 49.8)                                 | 112796                       | 939279         | 5.4 (4.0, 7.2) | 2.2 (1.5, 3.4)  |
| Nigeria | Jigawa                | Mar-2014 | Phase 1   | No                                             | -                       | -               | 51616                        | 48.5 (41.1, 55.8)                                 | 106519                       | 962667         | 5.3 (3.9, 7.3) | 2.1 (1.5, 3.0)  |
| Nigeria | Jigawa                | Jul-2015 | Phase 1   | Yes                                            | -                       | -               | 70175                        | 35.3 (26.3, 44.3)*                                | 198728                       | 986637         | 4.1 (2.8, 5.9) | 4.9 (3.2, 7.6)  |
| Nigeria | Kano                  | Jul-2011 | Phase 1   | Yes                                            | -                       | -               | 6479                         | 35.3 (26.3, 44.3)*                                | 18348                        | 1850915        | 3.2 (2.1, 4.7) | 0.3 (0.2, 0.5)  |
| Nigeria | Kano                  | Feb-2012 | Phase 1   | No                                             | -                       | -               | 24087                        | 35.3 (26.3, 44.3)*                                | 68212                        | 1897003        | 2.8 (1.9, 4.2) | 1.3 (0.8, 2.1)  |
| Nigeria | Kano                  | Sep-2012 | Phase 1   | Yes                                            | -                       | -               | 24087                        | 35.3 (26.3, 44.3)*                                | 68212                        | 1897003        | 3.2 (2.2, 4.6) | 1.1 (0.7, 1.7)  |
| Nigeria | Kano                  | Aug-2013 | Phase 1   | Yes                                            | -                       | -               | 36931                        | 35.3 (26.3, 44.3)*                                | 104584                       | 1944238        | 4.8 (3.4, 6.6) | 1.1 (0.7, 1.7)  |
| Nigeria | Kano                  | Mar-2014 | Phase 1   | No                                             | -                       | -               | 39205                        | 28.0 (17.9, 38.1)                                 | 140045                       | 1992650        | 5.8 (4.3, 7.9) | 1.2 (0.8, 2.1)  |

| Country | Sub-national location | Date     | IPC Phase | Prevalence estimate taken during hungry season | MAM treatment available | Acute emergency | SAM treatment admissions (n) | Coverage estimate (%); [*denotes country average] | Estimated incident cases (n) | Population (n) | Prevalence (%)   | K estimate      |
|---------|-----------------------|----------|-----------|------------------------------------------------|-------------------------|-----------------|------------------------------|---------------------------------------------------|------------------------------|----------------|------------------|-----------------|
| Nigeria | Kano                  | Jul-2015 | Phase 1   | Yes                                            | -                       | -               | 57195                        | 35.3 (26.3, 44.3)*                                | 161970                       | 2042267        | 4.3 (2.9, 6.4)   | 1.8 (1.2, 3.0)  |
| Nigeria | Katsina               | Aug-2010 | Phase 2   | Yes                                            | -                       | -               | 10968                        | 35.3 (26.3, 44.3)*                                | 31060                        | 1199432        | 7.0 (5.4, 9.1)   | 0.4 (0.3, 0.5)  |
| Nigeria | Katsina               | Nov-2010 | Phase 1   | No                                             | -                       | -               | 10968                        | 35.3 (26.3, 44.3)*                                | 31060                        | 1199432        | 5.8 (4.1, 8.3)   | 0.4 (0.3, 0.7)  |
| Nigeria | Katsina               | Aug-2011 | Phase 1   | Yes                                            | -                       | -               | 45048                        | 35.3 (26.3, 44.3)*                                | 127571                       | 1229298        | 4.5 (3.3, 6.1)   | 2.3 (1.6, 3.5)  |
| Nigeria | Katsina               | Mar-2012 | Phase 1   | No                                             | -                       | -               | 49373                        | 35.3 (26.3, 44.3)*                                | 139819                       | 1259907        | 1.6 (1.0, 2.7)   | 6.9 (4.0, 12.4) |
| Nigeria | Katsina               | Sep-2012 | Phase 1   | Yes                                            | -                       | -               | 49373                        | 35.3 (26.3, 44.3)*                                | 139819                       | 1259907        | 3.5 (2.5, 4.8)   | 3.2 (2.1, 5.0)  |
| Nigeria | Katsina               | Sep-2013 | Phase 1   | Yes                                            | -                       | -               | 54934                        | 53.4 (43.9, 62.9)                                 | 102876                       | 1291279        | 6.7 (5.2, 8.6)   | 1.2 (0.9, 1.6)  |
| Nigeria | Katsina               | Mar-2014 | Phase 1   | No                                             | -                       | -               | 78856                        | 32.4 (22.1, 42.6)                                 | 243480                       | 1323432        | 4.3 (3.0, 6.1)   | 4.3 (2.7, 7.5)  |
| Nigeria | Katsina               | Jul-2015 | Phase 1   | Yes                                            | -                       | -               | 76776                        | 35.3 (26.3, 44.3)*                                | 217421                       | 1356385        | 4.9 (3.4, 7.0)   | 3.3 (2.1, 5.3)  |
| Nigeria | Kebbi                 | Jul-2010 | Phase 2   | Yes                                            | -                       | -               | 9106                         | 35.3 (26.3, 44.3)*                                | 25787                        | 652783         | 11.0 (8.8, 13.7) | 0.4 (0.3, 0.5)  |
| Nigeria | Kebbi                 | Dec-2010 | Phase 1   | No                                             | -                       | -               | 9106                         | 35.3 (26.3, 44.3)*                                | 25787                        | 652783         | 5.8 (4.1, 8.1)   | 0.7 (0.5, 1.1)  |
| Nigeria | Kebbi                 | Aug-2011 | Phase 1   | Yes                                            | -                       | -               | 14687                        | 35.3 (26.3, 44.3)*                                | 41592                        | 669038         | 3.4 (2.4, 4.8)   | 1.8 (1.2, 2.8)  |
| Nigeria | Kebbi                 | Feb-2012 | Phase 1   | No                                             | -                       | -               | 19333                        | 35.3 (26.3, 44.3)*                                | 54749                        | 685697         | 3.9 (2.7, 5.6)   | 2.1 (1.3, 3.3)  |
| Nigeria | Kebbi                 | Sep-2012 | Phase 1   | Yes                                            | -                       | -               | 19333                        | 35.3 (26.3, 44.3)*                                | 54749                        | 685697         | 5.6 (4.3, 7.4)   | 1.4 (1.0, 2.1)  |
| Nigeria | Kebbi                 | Jul-2013 | Phase 1   | Yes                                            | -                       | -               | 17777                        | 35.3 (26.3, 44.3)*                                | 50342                        | 702770         | 2.7 (1.8, 4.2)   | 2.6 (1.6, 4.6)  |
| Nigeria | Kebbi                 | Mar-2014 | Phase 1   | No                                             | -                       | -               | 26431                        | 30.5 (20.6, 40.3)                                 | 86784                        | 720269         | 5.9 (4.4, 8.1)   | 2.0 (1.4, 3.5)  |
| Nigeria | Kebbi                 | Jul-2015 | Phase 1   | Yes                                            | -                       | -               | 30259                        | 35.3 (26.3, 44.3)*                                | 85690                        | 738204         | 3.3 (2.2, 4.9)   | 3.5 (2.2, 5.9)  |
| Nigeria | Sokoto                | Aug-2010 | Phase 2   | Yes                                            | -                       | -               | 4771                         | 35.3 (26.3, 44.3)*                                | 13511                        | 743238         | 5.3 (3.7, 7.4)   | 0.3 (0.2, 0.5)  |
| Nigeria | Sokoto                | Dec-2010 | Phase 1   | No                                             | -                       | -               | 4771                         | 35.3 (26.3, 44.3)*                                | 13511                        | 743238         | 5.2 (3.7, 7.4)   | 0.3 (0.2, 0.6)  |
| Nigeria | Sokoto                | Aug-2011 | Phase 1   | Yes                                            | -                       | -               | 16261                        | 35.3 (26.3, 44.3)*                                | 46049                        | 761744         | 4.2 (3.0, 5.9)   | 1.4 (0.9, 2.2)  |
| Nigeria | Sokoto                | Mar-2012 | Phase 1   | No                                             | -                       | -               | 18621                        | 35.3 (26.3, 44.3)*                                | 52733                        | 780712         | 4.4 (3.1, 6.2)   | 1.5 (1.0, 2.4)  |
| Nigeria | Sokoto                | Sep-2012 | Phase 1   | Yes                                            | -                       | -               | 18621                        | 35.3 (26.3, 44.3)*                                | 52733                        | 780712         | 8.8 (7.1, 10.9)  | 0.8 (0.6, 1.1)  |
| Nigeria | Sokoto                | Aug-2013 | Phase 1   | Yes                                            | -                       | -               | 11776                        | 35.3 (26.3, 44.3)*                                | 33348                        | 800151         | 3.6 (2.5, 5.1)   | 1.2 (0.7, 1.9)  |
| Nigeria | Sokoto                | Mar-2014 | Phase 1   | No                                             | -                       | -               | 20493                        | 48.3 (41.7, 55.0)                                 | 42402                        | 820075         | 3.4 (2.3, 5.1)   | 1.5 (1.0, 2.4)  |
| Nigeria | Sokoto                | Jul-2015 | Phase 1   | Yes                                            | -                       | -               | 25799                        | 27.1 (19.5, 34.7)                                 | 95208                        | 840495         | 5.3 (3.8, 7.3)   | 2.1 (1.4, 3.4)  |
| Nigeria | Yobe                  | Aug-2010 | Phase 3   | Yes                                            | -                       | -               | 2642                         | 35.3 (26.3, 44.3)*                                | 7482                         | 435800         | 7.3 (5.4, 9.9)   | 0.2 (0.2, 0.4)  |
| Nigeria | Yobe                  | Dec-2010 | Phase 1   | No                                             | -                       | -               | 2642                         | 35.3 (26.3, 44.3)*                                | 7482                         | 435800         | 3.2 (2.0, 5.3)   | 0.5 (0.3, 1.0)  |
| Nigeria | Yobe                  | Aug-2011 | Phase 1   | Yes                                            | -                       | -               | 11528                        | 33.0 (23.8, 42.2)                                 | 34944                        | 446652         | 1.9 (1.2, 3.0)   | 4.1 (2.4, 7.0)  |
| Nigeria | Yobe                  | Mar-2012 | Phase 1   | No                                             | -                       | -               | 23978                        | 35.3 (26.3, 44.3)*                                | 67903                        | 457773         | 4.1 (2.9, 5.8)   | 3.6 (2.4, 5.6)  |

| Country     | Sub-national location            | Date     | IPC Phase | Prevalence estimate taken during hungry season | MAM treatment available | Acute emergency | SAM treatment admissions (n) | Coverage estimate (%); [*denotes country average] | Estimated incident cases (n) | Population (n) | Prevalence (%)  | K estimate        |
|-------------|----------------------------------|----------|-----------|------------------------------------------------|-------------------------|-----------------|------------------------------|---------------------------------------------------|------------------------------|----------------|-----------------|-------------------|
| Nigeria     | Yobe                             | Sep-2012 | Phase 2   | Yes                                            | -                       | -               | 23978                        | 35.3 (26.3, 44.3)*                                | 67903                        | 457773         | 3.8 (2.6, 5.4)  | 3.9 (2.5, 6.3)    |
| Nigeria     | Yobe                             | Aug-2013 | Phase 3   | Yes                                            | -                       | -               | 23230                        | 34.8 (23.7, 45.8)                                 | 66786                        | 469172         | 2.4 (1.5, 3.7)  | 6.1 (3.5, 10.9)   |
| Nigeria     | Yobe                             | Mar-2014 | Phase 3   | No                                             | -                       | -               | 34262                        | 39.7 (30.7, 48.7)                                 | 86370                        | 480854         | 3.5 (2.3, 5.2)  | 5.1 (3.3, 8.1)    |
| Nigeria     | Yobe                             | Jul-2015 | Phase 4   | Yes                                            | -                       | -               | 52394                        | 35.3 (26.3, 44.3)*                                | 148374                       | 492827         | 3.4 (2.3, 5.2)  | 8.7 (5.6, 14.5)   |
| Nigeria     | Zamfara                          | Aug-2010 | Phase 2   | Yes                                            | -                       | -               | 1135                         | 35.3 (26.3, 44.3)*                                | 3214                         | 658126         | 4.8 (3.4, 6.8)  | 0.1 (0.1, 0.2)    |
| Nigeria     | Zamfara                          | Dec-2010 | Phase 1   | No                                             | -                       | -               | 1135                         | 35.3 (26.3, 44.3)*                                | 3214                         | 658126         | 7.4 (5.7, 9.6)  | 0.1 (0.0, 0.1)    |
| Nigeria     | Zamfara                          | Aug-2011 | Phase 1   | Yes                                            | -                       | -               | 8128                         | 35.3 (26.3, 44.3)*                                | 23018                        | 674513         | 6.1 (4.7, 8.0)  | 0.6 (0.4, 0.8)    |
| Nigeria     | Zamfara                          | Feb-2012 | Phase 1   | No                                             | -                       | -               | 17005                        | 35.3 (26.3, 44.3)*                                | 48156                        | 691309         | 4.0 (2.8, 5.6)  | 1.8 (1.2, 2.8)    |
| Nigeria     | Zamfara                          | Sep-2012 | Phase 1   | Yes                                            | -                       | -               | 17005                        | 35.3 (26.3, 44.3)*                                | 48156                        | 691309         | 5.6 (4.3, 7.4)  | 1.2 (0.9, 1.9)    |
| Nigeria     | Zamfara                          | Aug-2013 | Phase 1   | Yes                                            | -                       | -               | 23907                        | 35.3 (26.3, 44.3)*                                | 67702                        | 708522         | 4.0 (2.9, 5.7)  | 2.4 (1.6, 3.7)    |
| Nigeria     | Zamfara                          | Mar-2014 | Phase 1   | No                                             | -                       | -               | 30349                        | 39.6 (30.7, 48.5)                                 | 76718                        | 726164         | 2.8 (1.8, 4.4)  | 3.7 (2.3, 6.3)    |
| Nigeria     | Zamfara                          | Jul-2015 | Phase 1   | Yes                                            | -                       | -               | 33601                        | 35.3 (26.3, 44.3)*                                | 95154                        | 744246         | 3.3 (2.2, 5.1)  | 3.8 (2.4, 6.1)    |
| Somalia     | Bakool Pastoral                  | Dec-2015 | Phase 3   | No                                             | -                       | -               | 3228                         | 55.6 (45.2, 65.9)*                                | 5807                         | 6920           | 2.2 (1.3, 3.7)  | 37.7 (22.0, 62.9) |
| Somalia     | Beledweyne Rural                 | Jul-2016 |           | No                                             | -                       | -               | 1435                         | 55.6 (45.2, 65.9)*                                | 2582                         | 17084          | 6.1 (4.4, 8.5)  | 2.5 (1.7, 3.7)    |
| South Sudan | Gogrial East County              | Jun-2016 | Phase 3   | Yes                                            | Yes                     | Yes             | 2622                         | 40.8 (29.6, 53.5)*                                | 6426                         | 27403          | 8.0 (5.9, 10.8) | 2.9 (2.0, 4.6)    |
| South Sudan | Ikotos County                    | Jan-2017 | Phase 3   | No                                             | Yes                     | Yes             | 1580                         | 40.8 (29.6, 53.5)*                                | 3873                         | 27393          | 9.1 (6.8, 12.1) | 1.6 (1.0, 2.4)    |
| South Sudan | Ikotos County                    | Nov-2017 | Phase 3   | No                                             | Yes                     | Yes             | 1441                         | 40.8 (29.6, 53.5)*                                | 3532                         | 27393          | 3.5 (2.3, 5.3)  | 3.7 (2.1, 6.0)    |
| South Sudan | Tonj North County                | Jun-2016 | Phase 2   | Yes                                            | Yes                     | Yes             | 1616                         | 40.8 (29.6, 53.5)*                                | 3961                         | 43948          | 2.0 (1.2, 3.3)  | 4.6 (2.5, 8.3)    |
| South Sudan | Tonj North County                | Jul-2017 | Phase 3   | Yes                                            | Yes                     | Yes             | 2060                         | 40.8 (29.6, 53.5)*                                | 5049                         | 45558          | 5.4 (4.1, 7.1)  | 2.1 (1.4, 3.2)    |
| Uganda      | Abim district, Karamoja Region   | May-2016 | Phase 2   | Yes                                            | Yes                     | Yes             | 466                          | 34.4 (29.6, 40.7)*                                | 1355                         | 18299          | 1.5 (0.9, 2.6)  | 4.9 (2.7, 8.4)    |
| Uganda      | Abim district, Karamoja Region   | Dec-2016 | Phase 2   | No                                             | Yes                     | Yes             | 565                          | 34.4 (29.6, 40.7)*                                | 1642                         | 18299          | 4.3 (2.6, 6.9)  | 2.1 (1.3, 3.5)    |
| Uganda      | Abim district, Karamoja Region   | Dec-2017 | Phase 2   | No                                             | Yes                     | Yes             | 564                          | 34.4 (29.6, 40.7)*                                | 1640                         | 18874          | 2.4 (1.5, 3.6)  | 3.7 (2.3, 5.7)    |
| Uganda      | Abim district, Karamoja Region   | Jul-2018 | Phase 1   | Yes                                            | Yes                     | No              | 564                          | 34.4 (29.6, 40.7)*                                | 1640                         | 19468          | 2.8 (1.9, 4.2)  | 3.0 (1.9, 4.8)    |
| Uganda      | Amudat district, Karamoja Region | May-2016 | Phase 2   | Yes                                            | Yes                     | Yes             | 339                          | 34.4 (29.6, 40.7)*                                | 985                          | 17926          | 3.3 (2.0, 5.3)  | 1.7 (1.0, 2.7)    |



| Country | Sub-national location                   | Date     | IPC Phase | Prevalence estimate taken during hungry season | MAM treatment available | Acute emergency | SAM treatment admissions (n) | Coverage estimate (%); [*denotes country average] | Estimated incident cases (n) | Population (n) | Prevalence (%)  | K estimate     |
|---------|-----------------------------------------|----------|-----------|------------------------------------------------|-------------------------|-----------------|------------------------------|---------------------------------------------------|------------------------------|----------------|-----------------|----------------|
| Uganda  | Amudat district, Karamoja Region        | Dec-2016 | Phase 2   | No                                             | Yes                     | Yes             | 274                          | 34.4 (29.6, 40.7)*                                | 797                          | 17926          | 7.6 (5.5, 10.5) | 0.6 (0.4, 0.8) |
| Uganda  | Amudat district, Karamoja Region        | Dec-2017 | Phase 2   | No                                             | Yes                     | Yes             | 233                          | 34.4 (29.6, 40.7)*                                | 677                          | 18490          | 4.2 (3.0, 5.8)  | 0.9 (0.6, 1.2) |
| Uganda  | Amudat district, Karamoja Region        | Jul-2018 | Phase 1   | Yes                                            | Yes                     | No              | 233                          | 34.4 (29.6, 40.7)*                                | 677                          | 19072          | 3.7 (2.6, 5.3)  | 1.0 (0.6, 1.4) |
| Uganda  | Kaabong district, Karamoja Region       | May-2016 | Phase 3   | Yes                                            | Yes                     | Yes             | 2078                         | 34.4 (29.6, 40.7)*                                | 6041                         | 28453          | 4.0 (2.9, 5.6)  | 5.3 (3.6, 7.6) |
| Uganda  | Kaabong district, Karamoja Region       | Dec-2016 | Phase 2   | No                                             | Yes                     | Yes             | 1982                         | 34.4 (29.6, 40.7)*                                | 5762                         | 28453          | 5.1 (3.2, 8.0)  | 3.9 (2.5, 6.1) |
| Uganda  | Kaabong district, Karamoja Region       | Dec-2017 | Phase 2   | No                                             | Yes                     | Yes             | 1153                         | 34.4 (29.6, 40.7)*                                | 3352                         | 29348          | 4.0 (2.9, 5.5)  | 2.9 (2.0, 4.0) |
| Uganda  | Kaabong district, Karamoja Region       | Jul-2018 | Phase 2   | Yes                                            | Yes                     | No              | 1153                         | 34.4 (29.6, 40.7)*                                | 3352                         | 30272          | 5.9 (4.3, 8.0)  | 1.9 (1.3, 2.6) |
| Uganda  | Kotido district, Karamoja Region        | May-2016 | Phase 2   | Yes                                            | Yes                     | Yes             | 1868                         | 34.4 (29.6, 40.7)*                                | 5430                         | 30685          | 6.0 (4.6, 7.9)  | 2.9 (2.1, 3.9) |
| Uganda  | Kotido district, Karamoja Region        | Dec-2017 | Phase 1   | No                                             | Yes                     | Yes             | 2056                         | 34.4 (29.6, 40.7)*                                | 5977                         | 31651          | 4.8 (3.6, 6.5)  | 3.9 (2.8, 5.4) |
| Uganda  | Kotido district, Karamoja Region        | Jul-2018 | Phase 2   | Yes                                            | Yes                     | No              | 2056                         | 34.4 (29.6, 40.7)*                                | 5977                         | 32647          | 4.1 (2.8, 5.8)  | 4.5 (3.1, 6.6) |
| Uganda  | Moroto district, Karamoja Region        | May-2016 | Phase 3   | Yes                                            | Yes                     | Yes             | 965                          | 34.4 (29.6, 40.7)*                                | 2805                         | 17530          | 5.0 (3.5, 7.2)  | 3.2 (2.1, 4.9) |
| Uganda  | Moroto district, Karamoja Region        | Dec-2017 | Phase 2   | No                                             | Yes                     | Yes             | 750                          | 34.4 (29.6, 40.7)*                                | 2180                         | 18082          | 5.1 (3.7, 7.0)  | 2.4 (1.7, 3.4) |
| Uganda  | Moroto district, Karamoja Region        | Jul-2018 | Phase 2   | Yes                                            | Yes                     | No              | 750                          | 34.4 (29.6, 40.7)*                                | 2180                         | 18651          | 3.3 (2.2, 5.0)  | 3.5 (2.2, 5.7) |
| Uganda  | Nakapiripirit district, Karamoja Region | May-2016 | Phase 2   | Yes                                            | Yes                     | Yes             | 1287                         | 34.4 (29.6, 40.7)*                                | 3741                         | 26556          | 4.7 (3.1, 6.9)  | 3.0 (1.9, 4.6) |

| Country | Sub-national location                   | Date     | IPC Phase | Prevalence estimate taken during hungry season | MAM treatment available | Acute emergency | SAM treatment admissions (n) | Coverage estimate (%); [*denotes country average] | Estimated incident cases (n) | Population (n) | Prevalence (%) | K estimate      |
|---------|-----------------------------------------|----------|-----------|------------------------------------------------|-------------------------|-----------------|------------------------------|---------------------------------------------------|------------------------------|----------------|----------------|-----------------|
| Uganda  | Nakapiripirit district, Karamoja Region | Dec-2016 | Phase 2   | No                                             | Yes                     | Yes             | 1161                         | 34.4 (29.6, 40.7)*                                | 3375                         | 26556          | 4.7 (3.5, 6.3) | 2.7 (1.9, 3.8)  |
| Uganda  | Nakapiripirit district, Karamoja Region | Dec-2017 | Phase 2   | No                                             | Yes                     | Yes             | 827                          | 34.4 (29.6, 40.7)*                                | 2404                         | 27392          | 4.4 (3.1, 6.2) | 2.0 (1.3, 2.9)  |
| Uganda  | Nakapiripirit district, Karamoja Region | Jul-2018 | Phase 2   | Yes                                            | Yes                     | No              | 827                          | 34.4 (29.6, 40.7)*                                | 2404                         | 28254          | 3.5 (2.0, 5.9) | 2.5 (1.4, 4.3)  |
| Uganda  | Napak district, Karamoja Region         | May-2016 | Phase 3   | Yes                                            | Yes                     | Yes             | 908                          | 34.4 (29.6, 40.7)*                                | 2640                         | 24105          | 4.7 (3.3, 6.7) | 2.3 (1.5, 3.5)  |
| Uganda  | Napak district, Karamoja Region         | Dec-2016 | Phase 2   | No                                             | Yes                     | Yes             | 853                          | 34.4 (29.6, 40.7)*                                | 2480                         | 24105          | 7.2 (5.3, 9.8) | 1.4 (1.0, 2.0)  |
| Uganda  | Napak district, Karamoja Region         | Dec-2017 | Phase 2   | No                                             | Yes                     | Yes             | 644                          | 34.4 (29.6, 40.7)*                                | 1872                         | 24863          | 2.8 (1.9, 4.2) | 2.7 (1.7, 4.2)  |
| Uganda  | Napak district, Karamoja Region         | Jul-2018 | Phase 2   | Yes                                            | Yes                     | No              | 644                          | 34.4 (29.6, 40.7)*                                | 1872                         | 25646          | 3.8 (2.9, 4.8) | 1.9 (1.4, 2.6)  |
| Yemen   | Abyan Governorate                       | Jan-2013 | Phase 4   | -                                              | -                       | -               | 10805                        | 61.6 (51.5, 71.7)*                                | 17541                        | 60838          | 3.2 (2.5, 4.1) | 9.1 (6.6, 12.2) |
| Yemen   | Abyan Governorate                       | Dec-2016 | Phase 4   | -                                              | -                       | -               | 6838                         | 61.6 (51.5, 71.7)*                                | 11101                        | 64192          | 3.1 (1.8, 5.1) | 5.6 (3.3, 9.7)  |
| Yemen   | Abyan Governorate                       | Jan-2018 | Phase 4   | -                                              | -                       | -               | 7263                         | 61.6 (51.5, 71.7)*                                | 11791                        | 66530          | 1.8 (1.2, 3.0) | 9.6 (5.9, 15.1) |
| Yemen   | Aden Governorate                        | Aug-2015 | Phase 4   | -                                              | -                       | -               | 5370                         | 61.6 (51.5, 71.7)*                                | 8718                         | 142967         | 3.2 (2.4, 4.2) | 1.9 (1.4, 2.7)  |
| Yemen   | Aden Governorate                        | Dec-2016 | Phase 3   | -                                              | -                       | -               | 3400                         | 61.6 (51.5, 71.7)*                                | 5519                         | 145548         | 5.5 (3.8, 8.0) | 0.7 (0.5, 1.0)  |
| Yemen   | Al-Baidha Governorate                   | Oct-2015 | Phase 4   | -                                              | -                       | -               | 6504                         | 61.6 (51.5, 71.7)*                                | 10558                        | 110120         | 1.0 (0.4, 2.1) | 9.9 (4.4, 25.5) |
| Yemen   | Al-Baidha Governorate                   | Dec-2016 | Phase 4   | -                                              | -                       | -               | 4760                         | 61.6 (51.5, 71.7)*                                | 7727                         | 112107         | 2.4 (1.3, 4.3) | 2.9 (1.6, 4.9)  |
| Yemen   | Al-Dale'e Governorate                   | Dec-2016 | Phase 4   | -                                              | -                       | -               | 8934                         | 61.6 (51.5, 71.7)*                                | 14503                        | 110766         | 3.3 (2.0, 5.4) | 3.9 (2.3, 6.5)  |
| Yemen   | Al-Jawf Governorate                     | Dec-2016 | Phase 3   | -                                              | -                       | -               | 3249                         | 61.6 (51.5, 71.7)*                                | 5274                         | 99266          | 4.6 (2.9, 7.1) | 1.2 (0.7, 1.9)  |
| Yemen   | Al-Mahweet Governorate                  | Jun-2013 | Phase 3   | -                                              | -                       | -               | 3038                         | 61.6 (51.5, 71.7)*                                | 4932                         | 91299          | 3.4 (2.6, 4.4) | 1.6 (1.2, 2.2)  |

| Country | Sub-national location  | Date     | IPC Phase | Prevalence estimate taken during hungry season | MAM treatment available | Acute emergency | SAM treatment admissions (n) | Coverage estimate (%); [*denotes country average] | Estimated incident cases (n) | Population (n) | Prevalence (%)   | K estimate      |
|---------|------------------------|----------|-----------|------------------------------------------------|-------------------------|-----------------|------------------------------|---------------------------------------------------|------------------------------|----------------|------------------|-----------------|
| Yemen   | Al-Mahweet Governorate | Dec-2016 | Phase 3   | -                                              | -                       | -               | 6655                         | 61.6 (51.5, 71.7)*                                | 10804                        | 96332          | 4.5 (3.0, 6.7)   | 2.5 (1.6, 4.3)  |
| Yemen   | Amran Governorate      | Sep-2013 | Phase 3   | -                                              | -                       | -               | 5163                         | 61.6 (51.5, 71.7)*                                | 8381                         | 162157         | 2.5 (1.9, 3.4)   | 2.1 (1.5, 3.0)  |
| Yemen   | Dhamar Governorate     | Dec-2016 | Phase 3   | -                                              | -                       | -               | 12992                        | 61.6 (51.5, 71.7)*                                | 21091                        | 171098         | 1.9 (1.0, 3.6)   | 6.4 (3.2, 12.1) |
| Yemen   | Dhamar Governorate     | Mar-2013 | -         | -                                              | -                       | -               | 6352                         | 61.6 (51.5, 71.7)*                                | 10312                        | 327007         | 2.5 (1.9, 3.3)   | 1.2 (0.9, 1.7)  |
| Yemen   | Governorate            | Dec-2016 | Phase 3   | -                                              | -                       | -               | 19937                        | 61.6 (51.5, 71.7)*                                | 32365                        | 345036         | 4.8 (3.2, 7.0)   | 2.0 (1.3, 3.0)  |
| Yemen   | Hajja Governorate      | May-2014 | Phase 4   | -                                              | -                       | -               | 21421                        | 61.6 (51.5, 71.7)*                                | 34774                        | 312047         | 3.0 (2.2, 4.0)   | 3.7 (2.7, 5.3)  |
| Yemen   | Hajja Governorate      | Sep-2015 | Phase 4   | -                                              | -                       | -               | 28958                        | 61.6 (51.5, 71.7)*                                | 47010                        | 317680         | 4.3 (3.3, 5.6)   | 3.4 (2.5, 4.7)  |
| Yemen   | Hajja Governorate      | Dec-2016 | Phase 4   | -                                              | -                       | -               | 21355                        | 61.6 (51.5, 71.7)*                                | 34667                        | 323414         | 3.5 (2.2, 5.5)   | 3.1 (1.9, 5.0)  |
| Yemen   | Houdeidah Governorate  | Mar-2014 | Phase 3   | -                                              | -                       | -               | 42361                        | 61.6 (51.5, 71.7)                                 | 68768                        | 502048         | 4.7 (3.7, 5.9)   | 2.9 (2.2, 3.9)  |
| Yemen   | Houdeidah Governorate  | Aug-2015 | Phase 4   | -                                              | -                       | -               | 62005                        | 61.6 (51.5, 71.7)*                                | 100657                       | 511109         | 11.2 (9.0, 13.9) | 1.8 (1.3, 2.4)  |
| Yemen   | Houdeidah Governorate  | Dec-2016 | Phase 4   | -                                              | -                       | -               | 70047                        | 61.6 (51.5, 71.7)*                                | 113713                       | 520335         | 6.8 (4.8, 9.5)   | 3.2 (2.2, 4.9)  |
| Yemen   | Ibb Governorate        | Dec-2016 | Phase 3   | -                                              | -                       | -               | 17981                        | 61.6 (51.5, 71.7)*                                | 29190                        | 396334         | 2.6 (1.4, 4.6)   | 2.8 (1.6, 5.1)  |
| Yemen   | Ibb Governorate        | Mar-2017 | Phase 3   | -                                              | -                       | -               | 20011                        | 61.6 (51.5, 71.7)*                                | 32485                        | 403488         | 1.5 (0.9, 2.4)   | 5.5 (3.2, 9.5)  |
| Yemen   | Lahj Governorate       | Jul-2014 | Phase 4   | -                                              | -                       | -               | 5267                         | 61.6 (51.5, 71.7)*                                | 8550                         | 124285         | 1.9 (1.3, 2.7)   | 3.7 (2.4, 5.7)  |
| Yemen   | Lahj Governorate       | Oct-2015 | Phase 4   | -                                              | -                       | -               | 6746                         | 61.6 (51.5, 71.7)*                                | 10951                        | 126528         | 3.6 (2.6, 5.0)   | 2.4 (1.7, 3.5)  |
| Yemen   | Lahj Governorate       | Dec-2016 | Phase 4   | -                                              | -                       | -               | 10611                        | 61.6 (51.5, 71.7)*                                | 17226                        | 128812         | 4.2 (2.7, 6.6)   | 3.2 (2.0, 5.2)  |
| Yemen   | Lahj Governorate       | Jul-2017 | Phase 4   | -                                              | -                       | -               | 10124                        | 61.6 (51.5, 71.7)*                                | 16435                        | 131137         | 4.1 (3.0, 5.5)   | 3.1 (2.2, 4.4)  |
| Yemen   | Mareb Governorate      | Dec-2016 | Phase 3   | -                                              | -                       | -               | 2440                         | 61.6 (51.5, 71.7)*                                | 3961                         | 47007          | 1.4 (0.7, 3.0)   | 5.8 (2.7, 12.3) |
| Yemen   | Rayma Governorate      | Dec-2016 | Phase 3   | -                                              | -                       | -               | 3468                         | 61.6 (51.5, 71.7)*                                | 5630                         | 90121          | 3.2 (1.9, 5.3)   | 2.0 (1.1, 3.5)  |
| Yemen   | Sa'ada Governorate     | Jun-2014 | Phase 4   | -                                              | -                       | -               | 9956                         | 61.6 (51.5, 71.7)*                                | 16162                        | 171892         | 5.4 (4.4, 6.8)   | 1.7 (1.3, 2.3)  |
| Yemen   | Sa'ada Governorate     | May-2016 | Phase 4   | -                                              | -                       | -               | 18937                        | 61.6 (51.5, 71.7)*                                | 30742                        | 178153         | 5.0 (3.9, 6.4)   | 3.4 (2.6, 4.7)  |

| Country | Sub-national location | Date     | IPC Phase | Prevalence estimate taken during hungry season | MAM treatment available | Acute emergency | SAM treatment admissions (n) | Coverage estimate (%); [*denotes country average] | Estimated incident cases (n) | Population (n) | Prevalence (%) | K estimate      |
|---------|-----------------------|----------|-----------|------------------------------------------------|-------------------------|-----------------|------------------------------|---------------------------------------------------|------------------------------|----------------|----------------|-----------------|
| Yemen   | Sana'a Governorate    | May-2016 | Phase 3   | -                                              | -                       | -               | 10843                        | 61.6 (51.5, 71.7)*                                | 17602                        | 236959         | 4.4 (3.3, 5.7) | 1.7 (1.2, 2.4)  |
| Yemen   | Shabwa Governorate    | Jan-2017 | Phase 4   | -                                              | -                       | -               | 5558                         | 61.6 (51.5, 71.7)*                                | 9023                         | 99590          | 1.3 (0.8, 2.1) | 7.0 (4.1, 12.1) |
| Yemen   | Taiz Governorate      | May-2014 | Phase 4   | -                                              | -                       | -               | 17522                        | 61.6 (51.5, 71.7)*                                | 28445                        | 463186         | 3.1 (2.5, 3.9) | 2.0 (1.5, 2.6)  |
| Yemen   | Taiz Governorate      | May-2016 | Phase 4   | -                                              | -                       | -               | 21180                        | 61.6 (51.5, 71.7)*                                | 34383                        | 480057         | 5.2 (4.3, 6.4) | 1.4 (1.1, 1.8)  |

**Supplemental Table 4. Stratified analyses of incidence correction factor estimates by Integrated Food Security Phase Classification**

| Geographic Area                     | Phase 1-2 |      |              | Phase 3-4 |      |              | p*    |
|-------------------------------------|-----------|------|--------------|-----------|------|--------------|-------|
|                                     | N         | K    | 95% CI       | N         | K    | 95% CI       |       |
| <b>All available</b>                | 230       | 3.3  | (2.8, 3.8)   | 103       | 3.9  | (3.2, 4.7)   | 0.085 |
| <b>Western and Central Africa</b>   | 172       | 3.4  | (2.8, 4.0)   | 18        | 5.9  | (2.5, 14.2)  | 0.021 |
| Burkina Faso                        | 31        | 4.0  | (3.4, 4.6)   | 0         | ---  | ---          | ---   |
| Chad                                | 20        | 10.9 | (6.0, 19.6)  | 6         | 38.7 | (22.5, 66.6) | 0.027 |
| Democratic Republic of Congo        | 1         | 6.2  | (3.6, 11.6)  | 0         | ---  | ---          | ---   |
| Liberia                             | 15        | 5.9  | (3.2, 11.1)  | 0         | ---  | ---          | ---   |
| Mali                                | 32        | 4.6  | (3.7, 5.6)   | 0         | ---  | ---          | ---   |
| Niger                               | 14        | 7.6  | (5.8, 10.0)  | 2         | 14.8 | (7.8, 28.2)  | 0.014 |
| Nigeria                             | 59        | 1.2  | (1.0, 1.6)   | 10        | 1.6  | (0.7, 3.8)   | 0.661 |
| <b>Eastern and Southern Africa</b>  | 52        | 3.2  | (2.5, 4.0)   | 45        | 4.3  | (3.4, 5.5)   | 0.035 |
| Burundi                             | 1         | 30.1 | (7.0, 106.4) | 0         | ---  | ---          | ---   |
| Ethiopia                            | 16        | 6.7  | (4.8, 9.5)   | 13        | 6.6  | (4.8, 9.1)   | 0.947 |
| Kenya                               | 9         | 1.5  | (0.7, 3.1)   | 18        | 2.7  | (1.9, 3.8)   | 0.036 |
| Madagascar                          | 2         | 9.3  | (6.5, 13.4)  | 6         | 8.2  | (6.0, 11.3)  | 0.664 |
| Somalia                             | 0         | ---  | ---          | 1         | 2.5  | (1.7, 3.7)   | ---   |
| South Sudan                         | 1         | 3.7  | (2.1, 6.0)   | 4         | 2.4  | (1.7, 3.4)   | 0.301 |
| Uganda                              | 23        | 2.3  | (1.8, 2.8)   | 3         | 3.4  | (2.1, 5.5)   | 0.174 |
| <b>Middle East and North Africa</b> | 0         | ---  | ---          | 34        | 2.9  | (2.4, 3.5)   | ---   |
| Yemen                               | 0         | ---  | ---          | 34        | 2.9  | (2.4, 3.5)   | ---   |
| <b>South Asia</b>                   | 6         | 1.9  | (0.7, 5.0)   | 6         | 2.2  | (1.0, 5.3)   | 0.589 |
| Afghanistan                         | 6         | 1.9  | (0.7, 5.0)   | 6         | 2.2  | (1.0, 5.3)   | 0.589 |

\*p value for Cochrane's Q statistic assessing heterogeneity between K estimates.
